# Supplementary material for: The Six-Item Version of the Internet Addiction Test: Its Development, Psychometric Properties, and Measurement Invariance among Women with Eating Disorders and Healthy School and University Students
Source: MDPI journal article supplement (doi:10.3390/ijerph182312341), 2021-11-24
Supplement: s1 [file s1]

Supplementary Table S3. Invariance of six-item IAT across different student groups

| Groups              | Invariance levels | $\chi^2$ | df | P     | $\Delta\chi^2$ | $\Delta df$ | $p(\Delta\chi^2)$ | CFI  | $\Delta CFI$ | TLI  | $\Delta TLI$ | RMSEA | $\Delta RMSEA$ | SRMR   |
|---------------------|-------------------|----------|----|-------|----------------|-------------|-------------------|------|--------------|------|--------------|-------|----------------|--------|
| Gender              | Configural        | 43.324   | 14 | 0.001 |                |             |                   | .980 |              | .958 |              | 0.043 |                | 0.0225 |
|                     | Metric            | 45.149   | 19 | 0.001 | 1.826          | 5           | 0.873             | .982 | -0.001       | .972 | -0.002       | .035  | 0.019          | 0.0223 |
|                     | Strong            | 48.583   | 20 | 0.001 | 3.434          | 1           | 0.064             | .981 | 0.004        | .971 | 0.007        | .036  | -0.038         | 0.0264 |
|                     | Strict            | 59.581   | 28 | 0.001 | 10.997         | 8           | 0.202             | .979 | 0.000        | .977 | -0.002       | .032  | 0.006          | 0.0247 |
| Nationality         | Configural        | 33.681   | 14 | 0.002 |                |             |                   | .986 |              | .971 |              | 0.037 |                | 0.0266 |
|                     | Metric            | 49.064   | 19 | 0.001 | 15.383         | 5           | 0.009             | .979 | -0.001       | .967 | -0.002       | .039  | 0.019          | 0.0277 |
|                     | Strong            | 49.107   | 20 | 0.001 | 0.043          | 1           | 0.835             | .980 | 0.004        | .970 | 0.007        | .037  | -0.038         | 0.0281 |
|                     | Strict            | 62.615   | 28 | 0.001 | 13.508         | 8           | 0.096             | .976 | 0.000        | .974 | -0.002       | .034  | 0.006          | 0.0289 |
| Major               | Configural        | 99.142   | 56 | 0.001 |                |             |                   | .971 |              | .969 |              | 0.026 |                | 0.0809 |
|                     | Metric            | 105.102  | 61 | 0.001 | 5.959          | 3           | 0.310             | .971 | -0.001       | .971 | -0.002       | .025  | 0.019          | 0.0786 |
|                     | Strong            | 105.400  | 62 | 0.001 | 0.298          | 1           | 0.585             | .971 | 0.004        | .972 | 0.007        | .025  | -0.038         | 0.0800 |
|                     | Strict            | 114.107  | 70 | 0.001 | 8.707          | 8           | 0.368             | .971 | 0.000        | .975 | -0.002       | .024  | 0.006          | 0.0834 |
| Academic Grade      | Configural        | 91.488   | 56 | 0.002 |                |             |                   | .976 |              | .974 |              | 0.024 |                | 0.0401 |
|                     | Metric            | 95.492   | 61 | 0.003 | 4.004          | 5           | 0.549             | .977 | -0.001       | .977 | -0.002       | .023  | 0.019          | 0.0397 |
|                     | Strong            | 96.247   | 62 | 0.003 | 0.755          | 1           | 0.385             | .977 | 0.004        | .978 | 0.007        | .022  | -0.038         | 0.0371 |
|                     | Strict            | 104.816  | 70 | 0.004 | 8.569          | 8           | 0.380             | .977 | 0.000        | .980 | -0.002       | .021  | 0.006          | 0.0359 |
| Internet activities | Configural        | 100.552  | 56 | 0.001 |                |             |                   | .970 |              | .968 |              | 0.027 |                | 0.0398 |
|                     | Metric            | 104.373  | 61 | 0.001 | 3.821          | 5           | 0.575             | .971 | -0.001       | .971 | -0.002       | .025  | 0.019          | 0.0434 |
|                     | Strong            | 104.466  | 62 | 0.001 | 0.093          | 1           | 0.760             | .971 | 0.004        | .972 | 0.007        | .025  | -0.038         | 0.0425 |
|                     | Strict            | 109.621  | 70 | 0.002 | 5.156          | 8           | 0.741             | .973 | 0.000        | .977 | -0.002       | .023  | 0.006          | 0.0401 |

$\chi^2$ : chi-square; df: degrees of freedom; CFI: comparative fit index; TLI: Tucker–Lewis index; RMSEA: root mean square error of approximation; CI: confidence interval; SRMR: standardized root mean residual
