# Supplementary material for: The Six-Item Version of the Internet Addiction Test: Its Development, Psychometric Properties, and Measurement Invariance among Women with Eating Disorders and Healthy School and University Students
Source: MDPI journal article supplement (doi:10.3390/ijerph182312341), 2021-11-24
Supplement: s1 [file s1]

Supplementary Table S2. Invariance of 12-item IAT across different student groups

| Groups              | Invariance levels | $\chi^2$ | df  | P     | $\Delta\chi^2$ | $\Delta df$ | $p(\Delta\chi^2)$ | CFI  | $\Delta CFI$ | TLI  | $\Delta TLI$ | RMSEA | $\Delta RMSEA$ | SRMR   |
|---------------------|-------------------|----------|-----|-------|----------------|-------------|-------------------|------|--------------|------|--------------|-------|----------------|--------|
| Gender              | Configural        | 386.503  | 100 | 0.001 |                |             |                   | .934 |              | .913 |              | 0.051 |                | 0.0466 |
|                     | Metric            | 394.771  | 110 | 0.001 | 8.268          | 10          | 0.603             | .935 | -0.001       | .922 | -0.002       | .048  | 0.019          | 0.0473 |
|                     | Strong            | 398.032  | 113 | 0.001 | 3.261          | 3           | 0.353             | .935 | 0.004        | .924 | 0.007        | .048  | -0.038         | 0.0484 |
|                     | Strict            | 485.964  | 128 | 0.001 | 87.932         | 15          | 0.001             | .918 | 0.000        | .916 | -0.002       | .050  | 0.006          | 0.0488 |
| Nationality         | Configural        | 384.084  | 100 | 0.001 |                |             |                   | .932 |              | .910 |              | 0.052 |                | 0.0431 |
|                     | Metric            | 392.354  | 110 | 0.001 | 8.270          | 10          | 0.602             | .932 | -0.001       | .919 | -0.002       | .050  | 0.019          | 0.0480 |
|                     | Strong            | 403.478  | 113 | 0.001 | 11.124         | 3           | 0.011             | .930 | 0.004        | .919 | 0.007        | .050  | -0.038         | 0.0494 |
|                     | Strict            | 429.452  | 128 | 0.001 | 24.973         | 15          | 0.038             | .928 | 0.000        | .925 | -0.002       | .048  | 0.006          | 0.0503 |
| Major               | Configural        | 582.604  | 256 | 0.001 |                |             |                   | .926 |              | .924 |              | 0.034 |                | 0.0854 |
|                     | Metric            | 589.774  | 266 | 0.001 | 7.170          | 10          | 0.709             | .927 | -0.001       | .927 | -0.002       | .033  | 0.019          | 0.0847 |
|                     | Strong            | 591.661  | 269 | 0.001 | 1.887          | 3           | 0.596             | .927 | 0.004        | .928 | 0.007        | .033  | -0.038         | 0.0846 |
|                     | Strict            | 617.909  | 284 | 0.001 | 26.248         | 15          | 0.035             | .924 | 0.000        | .930 | -0.002       | .032  | 0.006          | 0.0880 |
| Academic Grade      | Configural        | 597.208  | 256 | 0.001 |                |             |                   | .922 |              | .920 |              | 0.035 |                | 0.0756 |
|                     | Metric            | 601.176  | 266 | 0.001 | 3.968          | 10          | 0.949             | .924 | -0.001       | .924 | -0.002       | .034  | 0.019          | 0.0756 |
|                     | Strong            | 602.580  | 269 | 0.001 | 1.404          | 3           | 0.705             | .924 | 0.004        | .925 | 0.007        | .033  | -0.038         | 0.0752 |
|                     | Strict            | 616.086  | 284 | 0.001 | 13.506         | 15          | 0.563             | .924 | 0.000        | .930 | -0.002       | .032  | 0.006          | 0.0766 |
| Internet activities | Configural        | 620.787  | 256 | 0.001 |                |             |                   | .916 |              | .913 |              | 0.036 |                | 0.0860 |
|                     | Metric            | 634.746  | 266 | 0.001 | 13.959         | 10          | 0.175             | .915 | -0.001       | .916 | -0.002       | .035  | 0.019          | 0.0889 |
|                     | Strong            | 635.420  | 269 | 0.001 | 0.674          | 3           | 0.879             | .916 | 0.004        | .917 | 0.007        | .035  | -0.038         | 0.0848 |
|                     | Strict            | 660.831  | 284 | 0.001 | 25.411         | 15          | 0.045             | .913 | 0.000        | .919 | -0.002       | .034  | 0.006          | 0.0910 |

$\chi^2$ : chi-square; df: degrees of freedom; CFI: comparative fit index; TLI: Tucker–Lewis index; RMSEA: root mean square error of approximation; CI: confidence interval; SRMR: standardized root mean residual.
