# Supplementary material for: The Six-Item Version of the Internet Addiction Test: Its Development, Psychometric Properties, and Measurement Invariance among Women with Eating Disorders and Healthy School and University Students
Source: MDPI journal article supplement (doi:10.3390/ijerph182312341), 2021-11-24
Supplement: s1 [file s1]

**Supplementary Table S1.** Goodness-of-fit indices for different models of the Internet Addiction Test structure tested in confirmatory factor analysis

| Models          | Samples      | $\chi^2$ | <i>p</i> | <i>df</i> | CFI          | TLI          | RMSEA | RMSEA 90% CI   | SRMR   |
|-----------------|--------------|----------|----------|-----------|--------------|--------------|-------|----------------|--------|
| Model 1 (C)     | Whole sample | 654.259  | 0.001    | 170       | 0.886        | 0.873        | 0.153 | 0.141 to 0.165 | 0.0275 |
| 1F 20 items     | Group 1      | 462.130  | 0.001    | 170       | 0.818        | 0.787        | 0.172 | 0.153 to 0.191 | 0.0494 |
|                 | Group 2      | 438.790  | 0.001    | 170       | 0.895        | 0.882        | 0.158 | 0.140 to 0.177 | 0.0240 |
| Model 2 (E)     | Whole sample | 511.792  | 0.001    | 166       | <b>0.919</b> | <b>0.907</b> | 0.131 | 0.118 to 0.144 | 0.0252 |
| 1F 20 items     | Group 1      | 392.766  | 0.001    | 166       | <b>0.859</b> | <b>0.838</b> | 0.153 | 0.134 to 0.173 | 0.0461 |
|                 | Group 2      | 367.182  | 0.001    | 166       | <b>0.921</b> | <b>0.910</b> | 0.139 | 0.120 to 0.158 | 0.0226 |
| Model 3 (C)     | Whole sample | 563.213  | 0.001    | 152       | 0.897        | 0.884        | 0.149 | 0.136 to 0.162 | 0.0266 |
| 1F 19 items     | Group 1      | 374.480  | 0.001    | 152       | 0.849        | 0.831        | 0.159 | 0.139 to 0.179 | 0.0457 |
|                 | Group 2      | 388.993  | 0.001    | 152       | 0.901        | 0.889        | 0.157 | 0.138 to 0.177 | 0.0240 |
| Model 4 (E)     | Whole sample | 491.462  | 0.001    | 150       | 0.915        | 0.903        | 0.137 | 0.123 to 0.150 | 0.0252 |
| 1F 19 items     | Group 1      | 337.925  | 0.001    | 150       | 0.873        | 0.855        | 0.147 | 0.126 to 0.168 | 0.0438 |
|                 | Group 2      | 352.363  | 0.001    | 150       | 0.916        | 0.904        | 0.146 | 0.127 to 0.166 | 0.0231 |
| Model 5 (C)     | Whole sample | 634.629  | 0.001    | 169       | 0.891        | 0.877        | 0.150 | 0.138 to 0.163 | 0.0276 |
| 2F 20 items     | Group 1      | 455.022  | 0.001    | 169       | 0.822        | 0.800        | 0.172 | 0.152 to 0.190 | 0.0495 |
|                 | Group 2      | 426.691  | 0.001    | 169       | 0.899        | 0.887        | 0.156 | 0.137 to 0.174 | 0.0242 |
| Model 6 (E)     | Whole sample | 464.874  | 0.001    | 164       | 0.929        | 0.918        | 0.123 | 0.110 to 0.136 | 0.0245 |
| 2F 20 items     | Group 1      | 370.324  | 0.001    | 164       | 0.871        | 0.851        | 0.147 | 0.127 to 0.167 | .0456  |
|                 | Group 2      | 342.935  | 0.001    | 164       | 0.930        | 0.919        | 0.132 | 0.112 to 0.115 | 0.0221 |
| Model 7 (C)     | Whole sample | 545.697  | 0.001    | 151       | 0.901        | 0.888        | 0.146 | 0.133 to 0.160 | 0.0269 |
| 2F 19 items     | Group 1      | 367.160  | 0.001    | 151       | 0.854        | 0.834        | 0.157 | 0.137 to 0.178 | 0.0462 |
|                 | Group 2      | 378.530  | 0.001    | 151       | 0.905        | 0.893        | 0.155 | 0.135 to 0.174 | 0.0243 |
| Model 8 (E)     | Whole sample | 386.535  | 0.001    | 146       | <b>0.940</b> | <b>0.930</b> | 0.116 | 0.102 to 0.130 | 0.0234 |
| 2F 19 items     | Group 1      | 289.827  | 0.001    | 146       | <b>0.903</b> | <b>0.886</b> | 0.130 | 0.108 to 0.152 | 0.0412 |
|                 | Group 2      | 297.302  | 0.001    | 146       | <b>0.937</b> | <b>0.926</b> | 0.128 | 0.107 to 0.149 | 0.0219 |
| Model 9 (C)     | Whole sample | 651.049  | 0.001    | 169       | 0.887        | 0.873        | 0.151 | 0.141to 0.165  | 0.0272 |
| 2F 20 items     | Group 1      | 458.486  | 0.001    | 169       | 0.820        | 0.797        | 0.172 | 0.153 to 0.191 | 0.0492 |
|                 | Group 2      | 438.790  | 0.001    | 169       | 0.894        | 0.881        | 0.159 | 0.141 to 0.178 | 0.0240 |
| Model 10 (E)    | Whole sample | 477.796  | 0.001    | 164       | 0.926        | 0.915        | 0.125 | 0.112 to 0.138 | 0.0245 |
| 2F 20 items     | Group 1      | 372.203  | 0.001    | 164       | 0.870        | 0.85         | 0.148 | 0.128 to 0.168 | 0.0456 |
|                 | Group 2      | 351.567  | 0.001    | 164       | 0.927        | 0.915        | 0.135 | 0.115 to 0.154 | 0.0222 |
| Model 11        | Whole sample | 398.821  | 0.001    | 146       | <b>0.937</b> | <b>0.926</b> | 0.119 | 0.105 to 0.133 | 0.0235 |
| 2F 19 items (E) | Group 1      | 292.903  | 0.001    | 146       | <b>0.901</b> | <b>0.884</b> | 0.132 | 0.110 to 0.154 | 0.0412 |

|                     |              |              |              |     |              |              |              |                 |               |
|---------------------|--------------|--------------|--------------|-----|--------------|--------------|--------------|-----------------|---------------|
|                     | Group 2      | 303.875      | 0.001        | 146 | <b>0.934</b> | <b>0.923</b> | 0.131        | 0.110 to 0.152  | 0.0220        |
| Model 12 (C)        | Whole sample | 634.232      | 0.001        | 167 | 0.890        | 0.875        | 0.151        | 0.139 to 0.1 64 | 0.0285        |
| 3F 20 items         | Group 1      | 453.495      | 0.001        | 167 | 0.821        | 0.797        | 0.172        | 0.152 to 0.191  | 0.0500        |
|                     | Group 2      | 427.170      | 0.001        | 167 | 0.898        | 0.884        | 0.157        | 0.139 to 0.176  | 0.0253        |
| Model 13 (E)        | Whole sample | 502.340      | 0.001        | 163 | 0.920        | 0.907        | 0.131        | 0.118 to 0.144  | 0.0265        |
| 3F 20 items         | Group 1      | 388.884      | 0.001        | 163 | 0.859        | 0.836        | 0.155        | 0.135 to 0.174  | 0.0476        |
|                     | Group 2      | 381.009      | 0.001        | 163 | 0.915        | 0.903        | 0.144        | 0.125 to 0.163  | 0.0230        |
| Model 14 (E)        | Whole sample | 424.110      | 0.001        | 145 | 0.930        | 0.918        | 0.126        | 0.112 to 0.144  | 0.0252        |
| 3F 19 items         | Group 1      | 308.628      | 0.001        | 145 | 0.889        | 0.869        | 0.139        | 0.118 to 0.161  | 0.0430        |
|                     | Group 2      | 310.115      | 0.001        | 145 | 0.931        | 0.919        | 0.134        | 0.114 to 0.155  | 0.0235        |
| Model 15 (E)        | Whole sample | 390.520      | 0.001        | 145 | <b>0.939</b> | <b>0.928</b> | 0.118        | 0.104 to 0.132  | 0.0300        |
| A bifactor 19 items | Group 1      | 277.055      | 0.001        | 145 | <b>0.911</b> | <b>0.895</b> | 0.125        | 0.103 to 0.148  | 0.0534        |
|                     | Group 2      | 281.975      | 0.001        | 145 | <b>0.943</b> | <b>0.933</b> | 0.122        | 0.101 to 0.144  | 0.0205        |
| Model 16 (C)        | Whole sample | 224.174      | 0.001        | 53  | 0.928        | 0.910        | 0.163        | 0.141 to 0.185  | 0.0251        |
| 2F 12 items         | Group 1      | 149.886      | 0.001        | 53  | 0.887        | 0.859        | 0.178        | 0.144 to 0.211  | 0.0454        |
|                     | Group 2      | 163.270      | 0.001        | 53  | 0.924        | 0.905        | 0.182        | 0.150 to 0.214  | 0.0246        |
| Model 17 (E)        | Whole sample | 119.646      | 0.001        | 49  | <b>0.970</b> | <b>0.960</b> | 0.109        | 0.084 to 0.134  | 0.0212        |
| 2F 12 items         | Group 1      | 90.991       | 0.001        | 49  | <b>0.951</b> | <b>0.934</b> | 0.122        | 0.082 to 0.160  | 0.0433        |
|                     | Group 2      | 116.677      | 0.001        | 49  | <b>0.953</b> | <b>0.937</b> | 0.148        | 0.114 to 0.183  | 0.0201        |
| Model 18 (C)        | Whole sample | 29.014       | 0.001        | 9   | <b>0.981</b> | <b>0.968</b> | 0.135        | 0.082 to 0.191  | 0.0189        |
| 1F six items        | Group 1      | 22.941       | 0.006        | 9   | <b>0.962</b> | <b>0.936</b> | 0.163        | 0.082 to 0.284  | 0.0443        |
|                     | Group 2      | 19.650       | 0.020        | 9   | <b>0.983</b> | <b>0.972</b> | 0.137        | 0.052 to 0.220  | 0.0140        |
| Model 19 (E)        | Whole sample | <b>8.695</b> | <b>0.275</b> | 7   | <b>0.998</b> | <b>0.996</b> | <b>0.045</b> | 0.000 to 0.126  | <b>0.0096</b> |
| 1F six items        | Group 1      | <b>8.748</b> | <b>0.271</b> | 7   | <b>0.995</b> | <b>0.990</b> | <b>0.066</b> | 0.000 to 0.183  | <b>0.0289</b> |
|                     | Group 2      | <b>7.441</b> | <b>0.384</b> | 7   | <b>0.999</b> | <b>0.998</b> | <b>0.032</b> | 0.000 to 0.160  | <b>0.0086</b> |

$\chi^2$ : chi-square; df: degrees of freedom; CFI: comparative fit index; TLI: Tucker–Lewis index; RMSEA: root mean square error of approximation; CI: confidence interval; SRMR: standardized root mean residual; F: factor; (C): crude model; (E): the model involves correlating residuals. Values in bold denote acceptable/good fit.
