# Supplementary material for: The Six-Item Version of the Internet Addiction Test: Its Development, Psychometric Properties, and Measurement Invariance among Women with Eating Disorders and Healthy School and University Students
Source: MDPI journal article supplement (doi:10.3390/ijerph182312341), 2021-11-24
Supplement: s1 [file s1]

Items of the six-item Internet Addiction test along with the corresponding addictive domains.

| Addictive domains | Items                                                                                                                           |
|-------------------|---------------------------------------------------------------------------------------------------------------------------------|
| Conflict          | 6. Does your work suffer (e.g., postponing things, not meeting deadlines, etc.) because of the amount of time you spend online? |
| Mood modification | 10. Do you block disturbing thoughts about your life with soothing thoughts of the Internet?                                    |
| Salience          | 15. Do you feel preoccupied with the Internet when offline or fantasize about being online?                                     |
| Tolerance         | 16. Do you find yourself saying "Just a few more minutes" when online?                                                          |
| Relapse           | 17. Do you try to cut down the amount of time you spend online and fail?                                                        |
| Withdrawal        | 20. Do you feel depressed, moody, or nervous when you are offline, which goes away once you are back online?                    |
