# Supplementary material for: The Six-Item Version of the Internet Addiction Test: Its Development, Psychometric Properties, and Measurement Invariance among Women with Eating Disorders and Healthy School and University Students
Source: MDPI journal article supplement (doi:10.3390/ijerph182312341), 2021-11-24
Supplement: s1 [file s1]

3.2.2. Factor structure of the Internet Addiction Test as revealed by EFA in the EDs sample

**Supplementary Table S4.** Summary of exploratory factor analysis (maximum likelihood with Varimax rotation) of the Spanish version of the Internet Addiction Test.

| Criteria                         | Whole sample (N = 123) | Anorexia nervosa (N = 59) | Other eating disorders (N = 64) |
|----------------------------------|------------------------|---------------------------|---------------------------------|
| Range of item communalities      | 0.788 – 0.947          | 0.670 – 0.948             | 0.857 – 0.977                   |
| Percentage of variance explained | 83.4%                  | 74.4%                     | 87.4%                           |
| Kaiser–Meyer–Olkin test          | 0.956                  | 0.910                     | 0.942                           |
| Bartlett’s test $\chi^2$ (df)    | 4172.9 (190) **        | 1562.8 (190) **           | 2416.4 (190) **                 |

$\chi^2$ : chi square test, df: degree of freedom, \*\*: p = 0.000.

EFA resulted in a single factor explaining 74% - 87% of the total variances in the samples. All items had high communalities while high values of KMO test and significant  $\chi^2$  of Bartlett’s test indicated appropriateness of the participant-to-item ratio and sample size for an EFA in the samples (Table 2)—further details in the Supplementary material (e.g., the scree plots, item communalities, etc.).
