# Supplementary material for: The Six-Item Version of the Internet Addiction Test: Its Development, Psychometric Properties, and Measurement Invariance among Women with Eating Disorders and Healthy School and University Students
Source: Int J Environ Res Public Health. 2021 Nov 24;18(23):12341. doi: 10.3390/ijerph182312341 (PMC8657305; doi:10.3390/ijerph182312341)
Supplement: Supplementary file 1 [file ijerph-18-12341-s001.zip › Excel S1. Additional analyses results not reported in the text.xlsx]

## Sheet: EFA school children
Factor Analysis
KMO and Bartlett's Test
Kaiser-Meyer-Olkin Measure of Sampling Adequacy.		0.934639
Bartlett's Test of Sphericity	Approx. Chi-Square	6175.11
	df	190
	Sig.	0
Communalities
	Initial
IAT_1	0.338828
IAT_2	0.273235
IAT_3	0.338427
IAT_4	0.21042
IAT_5	0.240912
IAT_6	0.217882
IAT_7	0.068064
IAT_8	0.32512
IAT_9	0.18251
IAT_10	0.219195
IAT_11	0.421862
IAT_12	0.309138
IAT_13	0.297417
IAT_14	0.400747
IAT_15	0.445938
IAT_16	0.550696
IAT_17	0.374514
IAT_18	0.332466
IAT_19	0.408847
IAT_20	0.477628
Extraction Method: Maximum Likelihood.
Total Variance Explained
Factor	Initial Eigenvalues			Rotation Sums of Squared Loadings
	Total	% of Variance	Cumulative %	Total	% of Variance	Cumulative %
1	6.51807	32.5904	32.5904	3.16181	15.8091	15.8091
2	1.35588	6.77938	39.3697	1.92165	9.60824	25.4173
3	1.14732	5.73659	45.1063	1.36609	6.83043	32.2477
4	1.02296	5.11478	50.2211	1.11712	5.5856	37.8333
5	0.944269	4.72134	54.9425
6	0.872153	4.36077	59.3032
7	0.823931	4.11966	63.4229
8	0.76036	3.8018	67.2247
9	0.705891	3.52946	70.7541
10	0.668605	3.34302	74.0972
11	0.651624	3.25812	77.3553
12	0.613868	3.06934	80.4246
13	0.580751	2.90376	83.3284
14	0.56634	2.8317	86.1601
15	0.542245	2.71123	88.8713
16	0.527392	2.63696	91.5083
17	0.496587	2.48294	93.9912
18	0.427634	2.13817	96.1294
19	0.414412	2.07206	98.2014
20	0.359715	1.79858	100
Extraction Method: Maximum Likelihood.
Goodness-of-fit Test
Chi-Square	df	Sig.
303.781	116	9.46097e-19
Rotated Factor Matrixa
	Factor
	1	2	3	4
IAT_1	0.208452	0.611711	0.0622791	0.191769
IAT_2	0.224129	0.526854	0.149937	-0.00183525
IAT_3	0.448196	0.284384	0.287723	0.0408001
IAT_4	0.233687	0.131029	0.526731	-0.0907453
IAT_5	0.226148	0.373025	0.142683	0.182573
IAT_6	0.0450414	0.0990166	0.530729	0.181736
IAT_7	0.0445595	0.16756	0.175013	0.0737422
IAT_8	0.148035	0.419705	0.232915	0.401628
IAT_9	0.269857	0.115168	0.162316	0.253733
IAT_10	0.174478	0.0441336	0.480879	0.1886
IAT_11	0.572198	0.328161	0.0782752	0.146012
IAT_12	0.523079	0.118395	0.242646	0.0983631
IAT_13	0.403422	0.231946	0.113465	0.272234
IAT_14	0.443093	0.328901	0.271627	0.157297
IAT_15	0.627664	0.196119	0.189594	0.147588
IAT_16	0.578409	0.532139	0.0116275	0.179938
IAT_17	0.360828	0.328925	0.162374	0.381327
IAT_18	0.383544	0.194919	0.139228	0.450703
IAT_19	0.614087	0.189432	0.0919853	0.184501
IAT_20	0.537841	0.126732	0.305031	0.413273
Extraction Method: Maximum Likelihood. Rotation Method: Varimax with Kaiser Normalization.
a. Rotation converged in 8 iterations.
Factor Transformation Matrix
Factor	1	2	3	4
1	0.713765	0.505803	0.323308	0.360797
2	-0.0590198	-0.537229	0.832149	0.124218
3	-0.669024	0.645535	0.354203	0.101153
4	0.198653	0.197061	0.278461	-0.918784
Extraction Method: Maximum Likelihood. Rotation Method: Varimax with Kaiser Normalization.

## Sheet: Sheet2
Nonparametric Correlations
Correlations
			Facebook addiction	Internet addiction	Depression
Spearman's rho	Facebook addiction	Correlation Coefficient	1	.903**	-0.0818552
		Sig. (2-tailed)		1.55062e-46	0.368088
		N	124	124	123
	Internet addiction	Correlation Coefficient	.903**	1	-0.0873903
		Sig. (2-tailed)	1.55062e-46		0.336477
		N	124	124	123
	Depression	Correlation Coefficient	-0.0818552	-0.0873903	1
		Sig. (2-tailed)	0.368088	0.336477
		N	123	123	123
**. Correlation is significant at the 0.01 level (2-tailed).

## Sheet: Normality  IAT, IAT-6, IAT-12
GET
FILE='C:\Users\Amira Ali\Desktop\Desktop 2020 1 23\Addiction\Spain\Complete renamed IAT variables.sav'.
DATASET NAME DataSet1 WINDOW=FRONT.
EXAMINE VARIABLES=IAT_Total IAT_6Items IAT_12Items
/PLOT BOXPLOT NPPLOT
/COMPARE GROUPS
/STATISTICS DESCRIPTIVES
/CINTERVAL 95
/MISSING LISTWISE
/NOTOTAL.
Explore
Notes
Output Created		06-SEP-2021 05:18:56
Comments
Input	Data	C:\Users\Amira Ali\Desktop\Desktop 2020 1 23\Addiction\Spain\Complete renamed IAT variables.sav
	Active Dataset	DataSet1
	Filter	<none>
	Weight	<none>
	Split File	<none>
	N of Rows in Working Data File	123
Missing Value Handling	Definition of Missing	User-defined missing values for dependent variables are treated as missing.
	Cases Used	Statistics are based on cases with no missing values for any dependent variable or factor used.
Syntax		EXAMINE VARIABLES=IAT_Total IAT_6Items IAT_12Items /PLOT BOXPLOT NPPLOT /COMPARE GROUPS /STATISTICS DESCRIPTIVES /CINTERVAL 95 /MISSING LISTWISE /NOTOTAL.
Resources	Processor Time	00:00:02.37
	Elapsed Time	00:00:01.89
[DataSet1] C:\Users\Amira Ali\Desktop\Desktop 2020 1 23\Addiction\Spain\Complete renamed IAT variables.sav
Case Processing Summary
	Cases
	Valid		Missing		Total
	N	Percent	N	Percent	N	Percent
Internet addiction	123	1	0	0	123	1
Internet Addiction 6 items	123	1	0	0	123	1
Internet Addiction 12 items	123	1	0	0	123	1
Descriptives
			Statistic	Std. Error
Internet addiction	Mean		25.5691	2.43812
	95% Confidence Interval for Mean	Lower Bound	20.7426
		Upper Bound	30.3956
	5% Trimmed Mean		23.4426
	Median		16
	Variance		731.165
	Std. Deviation		27.0401
	Minimum		0
	Maximum		94
	Range		94
	Interquartile Range		30
	Skewness		1.17874	0.218232
	Kurtosis		0.264844	0.433156
Internet Addiction 6 items	Mean		7.36585	0.763459
	95% Confidence Interval for Mean	Lower Bound	5.85451
		Upper Bound	8.8772
	5% Trimmed Mean		6.64047
	Median		4
	Variance		71.6929
	Std. Deviation		8.46717
	Minimum		0
	Maximum		29
	Range		29
	Interquartile Range		10
	Skewness		1.22789	0.218232
	Kurtosis		0.389016	0.433156
Internet Addiction 12 items	Mean		14.7317	1.47443
	95% Confidence Interval for Mean	Lower Bound	11.8129
		Upper Bound	17.6505
	5% Trimmed Mean		13.3893
	Median		8
	Variance		267.395
	Std. Deviation		16.3522
	Minimum		0
	Maximum		56
	Range		56
	Interquartile Range		19
	Skewness		1.23181	0.218232
	Kurtosis		0.399432	0.433156
Tests of Normality
	Kolmogorov-Smirnova			Shapiro-Wilk
	Statistic	df	Sig.	Statistic	df	Sig.
Internet addiction	0.177187	123	3.51258e-10	0.827214	123	1.05569e-10
Internet Addiction 6 items	0.199223	123	4.86483e-13	0.80735	123	2.09592e-11
Internet Addiction 12 items	0.191084	123	6.11355e-12	0.81111	123	2.82103e-11
a. Lilliefors Significance Correction
Internet addiction
Internet Addiction 6 items
Internet Addiction 12 items
GET
FILE='C:\Users\Amira Ali\Desktop\Desktop 2020 1 23\Addiction\Spain\Anorexia.sav'.
DATASET NAME DataSet2 WINDOW=FRONT.
EXAMINE VARIABLES=IAT_Total IAT_6Items IAT_12Items
/PLOT BOXPLOT NPPLOT
/COMPARE GROUPS
/STATISTICS DESCRIPTIVES
/CINTERVAL 95
/MISSING LISTWISE
/NOTOTAL.
Explore
Notes
Output Created		06-SEP-2021 05:34:59
Comments
Input	Data	C:\Users\Amira Ali\Desktop\Desktop 2020 1 23\Addiction\Spain\Anorexia.sav
	Active Dataset	DataSet2
	Filter	<none>
	Weight	<none>
	Split File	<none>
	N of Rows in Working Data File	59
Missing Value Handling	Definition of Missing	User-defined missing values for dependent variables are treated as missing.
	Cases Used	Statistics are based on cases with no missing values for any dependent variable or factor used.
Syntax		EXAMINE VARIABLES=IAT_Total IAT_6Items IAT_12Items /PLOT BOXPLOT NPPLOT /COMPARE GROUPS /STATISTICS DESCRIPTIVES /CINTERVAL 95 /MISSING LISTWISE /NOTOTAL.
Resources	Processor Time	00:00:01.36
	Elapsed Time	00:00:01.29
[DataSet2] C:\Users\Amira Ali\Desktop\Desktop 2020 1 23\Addiction\Spain\Anorexia.sav
Case Processing Summary
	Cases
	Valid		Missing		Total
	N	Percent	N	Percent	N	Percent
Internet addiction	59	1	0	0	59	1
IAT_6Items	59	1	0	0	59	1
IAT_12Items	59	1	0	0	59	1
Descriptives
			Statistic	Std. Error
Internet addiction	Mean		20.7627	2.69568
	95% Confidence Interval for Mean	Lower Bound	15.3667
		Upper Bound	26.1587
	5% Trimmed Mean		18.5621
	Median		15
	Variance		428.736
	Std. Deviation		20.7059
	Minimum		0
	Maximum		90
	Range		90
	Interquartile Range		29
	Skewness		1.41467	0.311176
	Kurtosis		2.00198	0.613257
IAT_6Items	Mean		5.9322	0.828293
	95% Confidence Interval for Mean	Lower Bound	4.27419
		Upper Bound	7.59021
	5% Trimmed Mean		5.25706
	Median		4
	Variance		40.4781
	Std. Deviation		6.36224
	Minimum		0
	Maximum		25
	Range		25
	Interquartile Range		8
	Skewness		1.32134	0.311176
	Kurtosis		1.41966	0.613257
IAT_12Items	Mean		11.6441	1.6208
	95% Confidence Interval for Mean	Lower Bound	8.39969
		Upper Bound	14.8884
	5% Trimmed Mean		10.1949
	Median		7
	Variance		154.992
	Std. Deviation		12.4496
	Minimum		0
	Maximum		53
	Range		53
	Interquartile Range		17
	Skewness		1.53997	0.311176
	Kurtosis		2.3891	0.613257
Tests of Normality
	Kolmogorov-Smirnova			Shapiro-Wilk
	Statistic	df	Sig.	Statistic	df	Sig.
Internet addiction	0.16532	59	0.000365405	0.858932	59	6.575e-06
IAT_6Items	0.195592	59	6.55606e-06	0.842484	59	2.16302e-06
IAT_12Items	0.174817	59	0.000112741	0.829826	59	9.60686e-07
a. Lilliefors Significance Correction
Internet addiction
IAT_6Items
IAT_12Items
GET
FILE='C:\Users\Amira Ali\Desktop\Desktop 2020 1 23\Addiction\Spain\Other eating disorders.sav'.
DATASET NAME DataSet3 WINDOW=FRONT.
EXAMINE VARIABLES=IAT_Total IAT_6Items IAT_12Items
/PLOT BOXPLOT NPPLOT
/COMPARE GROUPS
/STATISTICS DESCRIPTIVES
/CINTERVAL 95
/MISSING LISTWISE
/NOTOTAL.
Explore
Notes
Output Created		06-SEP-2021 05:36:02
Comments
Input	Data	C:\Users\Amira Ali\Desktop\Desktop 2020 1 23\Addiction\Spain\Other eating disorders.sav
	Active Dataset	DataSet3
	Filter	<none>
	Weight	<none>
	Split File	<none>
	N of Rows in Working Data File	64
Missing Value Handling	Definition of Missing	User-defined missing values for dependent variables are treated as missing.
	Cases Used	Statistics are based on cases with no missing values for any dependent variable or factor used.
Syntax		EXAMINE VARIABLES=IAT_Total IAT_6Items IAT_12Items /PLOT BOXPLOT NPPLOT /COMPARE GROUPS /STATISTICS DESCRIPTIVES /CINTERVAL 95 /MISSING LISTWISE /NOTOTAL.
Resources	Processor Time	00:00:01.30
	Elapsed Time	00:00:01.30
[DataSet3] C:\Users\Amira Ali\Desktop\Desktop 2020 1 23\Addiction\Spain\Other eating disorders.sav
Case Processing Summary
	Cases
	Valid		Missing		Total
	N	Percent	N	Percent	N	Percent
Internet addiction	64	1	0	0	64	1
Internet Addiction 6	64	1	0	0	64	1
IAT_12Items	64	1	0	0	64	1
Descriptives
			Statistic	Std. Error
Internet addiction	Mean		30	3.91236
	95% Confidence Interval for Mean	Lower Bound	22.1818
		Upper Bound	37.8182
	5% Trimmed Mean		28.2917
	Median		16.5
	Variance		979.619
	Std. Deviation		31.2989
	Minimum		0
	Maximum		94
	Range		94
	Interquartile Range		49
	Skewness		0.872343	0.299327
	Kurtosis		-0.754548	0.590491
Internet Addiction 6	Mean		8.6875	1.23661
	95% Confidence Interval for Mean	Lower Bound	6.21633
		Upper Bound	11.1587
	5% Trimmed Mean		8.07986
	Median		4
	Variance		97.869
	Std. Deviation		9.89288
	Minimum		0
	Maximum		29
	Range		29
	Interquartile Range		14.25
	Skewness		0.948816	0.299327
	Kurtosis		-0.606625	0.590491
IAT_12Items	Mean		17.5781	2.36499
	95% Confidence Interval for Mean	Lower Bound	12.8521
		Upper Bound	22.3042
	5% Trimmed Mean		16.5174
	Median		9
	Variance		357.962
	Std. Deviation		18.9199
	Minimum		0
	Maximum		56
	Range		56
	Interquartile Range		27.5
	Skewness		0.897245	0.299327
	Kurtosis		-0.682806	0.590491
Tests of Normality
	Kolmogorov-Smirnova			Shapiro-Wilk
	Statistic	df	Sig.	Statistic	df	Sig.
Internet addiction	0.186138	64	8.78526e-06	0.819752	64	2.21359e-07
Internet Addiction 6	0.203602	64	5.56135e-07	0.799292	64	6.38134e-08
IAT_12Items	0.202495	64	6.68122e-07	0.815221	64	1.66875e-07
a. Lilliefors Significance Correction
Internet addiction
Internet Addiction 6
IAT_12Items

## Sheet: CFA of the IAT in ED patients
													1F IAT all items
													2F IAT all items German model
													2F IAT all items Spanish model

## Sheet: Subgroup analysis
Multigroup analysis of 1F 20 items with correlated errors
Assuming model Unconstrained to be correct:
Model	DF	CMIN	P	NFI	IFI	RFI	TLI
				Delta-1	Delta-2	rho-1	rho2
Measurement weights	19	15.27	0.705	0.003	0.004	-0.007	-0.007
Structural covariances	20	25.195	0.194	0.006	0.006	-0.005	-0.005
Measurement residuals	44	52.113	0.188	0.011	0.012	-0.011	-0.012
a1	1	0.573	0.449	0	0	0	0
a10 item 14	1	4.013	0.045	0.001	0.001	0	0
a11 item 15	1	6.72	0.01	0.001	0.002	0.001	0.001
a12 item 16	1	5.069	0.024	0.001	0.001	0.001	0.001
a13 item 17	1	3.594	0.058	0.001	0.001	0	0
a14	1	2.754	0.097	0.001	0.001	0	0
a15	1	0.177	0.674	0	0	-0.001	-0.001
a16	1	3.024	0.082	0.001	0.001	0	0
a17	1	0.011	0.918	0	0	-0.001	-0.001
a18	1	0.391	0.532	0	0	0	-0.001
a19	1	0.933	0.334	0	0	0	0
a2	1	2.427	0.119	0.001	0.001	0	0
a3	1	0.754	0.385	0	0	0	0
a4	1	0.575	0.448	0	0	0	0
a6	1	1.12	0.29	0	0	0	0
a7	1	0.227	0.634	0	0	-0.001	-0.001
a8	1	2.523	0.112	0.001	0.001	0	0
a9	1	2.881	0.09	0.001	0.001	0	0
a5	1	0.777	0.378	0	0	0	0
Multigroup analysis of 1F 19 items with correlated errors
Assuming model Unconstrained to be correct:
Model	DF	CMIN	P	NFI	IFI	RFI	TLI
				Delta-1	Delta-2	rho-1	rho2
Measurement weights	18	16.719	0.543	0.004	0.004	-0.006	-0.007
Structural covariances	19	27.28	0.098	0.006	0.007	-0.004	-0.005
Measurement residuals	40	50.022	0.133	0.012	0.013	-0.01	-0.011
a1	1	0.568	0.451	0	0	0	-0.001
a10---14	1	3.74	0.053	0.001	0.001	0	0
a11---item 15	1	6.239	0.012	0.001	0.002	0.001	0.001
a12---item 16	1	5.007	0.025	0.001	0.001	0.001	0.001
a13---17	1	3.348	0.067	0.001	0.001	0	0
a14	1	2.535	0.111	0.001	0.001	0	0
a15	1	0.177	0.674	0	0	-0.001	-0.001
a16	1	3.316	0.069	0.001	0.001	0	0
a17	1	0.044	0.835	0	0	-0.001	-0.001
a18	1	0.421	0.517	0	0	-0.001	-0.001
a2	1	2.393	0.122	0.001	0.001	0	0
a3	1	0.716	0.398	0	0	0	0
a4	1	0.48	0.489	0	0	0	-0.001
a5	1	0.889	0.346	0	0	0	0
a6	1	0.977	0.323	0	0	0	0
a7	1	0.229	0.633	0	0	-0.001	-0.001
a8	1	2.384	0.123	0.001	0.001	0	0
a9	1	3.067	0.08	0.001	0.001	0	0
Multigroup analysis of 2F 20 items with correlated errors
Assuming model Unconstrained to be correct:
Model	DF	CMIN	P	NFI	IFI	RFI	TLI
				Delta-1	Delta-2	rho-1	rho2
Measurement weights	18	11.095	0.89	0.002	0.003	-0.007	-0.007
Structural covariances	21	23.944	0.296	0.005	0.006	-0.005	-0.006
Measurement residuals	46	51.262	0.275	0.011	0.012	-0.011	-0.012
a2	1	2.546	0.111	0.001	0.001	0	0
a3	1	0.827	0.363	0	0	0	0
a4	1	0.612	0.434	0	0	0	0
a5	1	0.265	0.607	0	0	0	-0.001
a6---item 14	1	4.216	0.04	0.001	0.001	0.001	0.001
a7---item 15	1	6.614	0.01	0.001	0.002	0.001	0.001
a8	1	0.027	0.87	0	0	-0.001	-0.001
a9	1	0.075	0.784	0	0	-0.001	-0.001
a14---item 16	1	0.719	0.396	0	0	0	0
Multigroup analysis of (Model 8) 2F 19 items with correlated errors
Assuming model Unconstrained to be correct:
Model	DF	CMIN	P	NFI	IFI	RFI	TLI
				Delta-1	Delta-2	rho-1	rho2
Measurement weights	17	10.039	0.902	0.002	0.003	-0.006	-0.007
Structural covariances	20	23.526	0.264	0.006	0.006	-0.004	-0.005
Measurement residuals	44	47.857	0.319	0.011	0.012	-0.01	-0.011
a4	1	0.584	0.445	0	0	0	0
a6----item 14	1	4.088	0.043	0.001	0.001	0.001	0.001
a7----item 15	1	6.348	0.012	0.002	0.002	0.001	0.001
a13----item 16	1	0.523	0.47	0	0	0	0
Multigroup analysis of (Model 11) 2F 19 items with correlated errors
Assuming model Unconstrained to be correct:
Model	DF	CMIN	P	NFI	IFI	RFI	TLI
				Delta-1	Delta-2	rho-1	rho2
Measurement weights	17	13.329	0.714	0.003	0.003	-0.006	-0.006
Structural covariances	20	27.187	0.13	0.006	0.007	-0.004	-0.004
Measurement residuals	44	51.274	0.21	0.012	0.013	-0.009	-0.01
a14---item 15	1	2.47	0.116	0.001	0.001	0	0
a3---item 14	1	0.607	0.436	0	0	0	0
a4---item 16	1	0.659	0.417	0	0	0	0
a13---item 13	1	0.014	0.906	0	0	-0.001	-0.001
a10	1	0.007	0.933	0	0	-0.001	-0.001
a11	1	0.548	0.459	0	0	0	0
a12	1	0.049	0.825	0	0	-0.001	-0.001
a15	1	0.807	0.369	0	0	0	0
a16	1	0.018	0.892	0	0	-0.001	-0.001
a17	1	0.135	0.713	0	0	-0.001	-0.001
a2	1	0.274	0.601	0	0	0	-0.001
a5	1	0.426	0.514	0	0	0	0
a7	1	0.019	0.891	0	0	-0.001	-0.001
a8	1	0.545	0.46	0	0	0	0
a9	1	0.255	0.614	0	0	0	-0.001
Assuming model Unconstrained to be correct:
Model	DF	CMIN	P	NFI	IFI	RFI	TLI
				Delta-1	Delta-2	rho-1	rho2
Measurement weights	17	13.329	0.714	0.003	0.003	-0.006	-0.006
Structural covariances	20	27.187	0.13	0.006	0.007	-0.004	-0.004
Measurement residuals	44	51.274	0.21	0.012	0.013	-0.009	-0.01
ccc1	1	6.022	0.014	0.001	0.002	0.001	0.001
c1	1	0.047	0.829	0	0	-0.001	-0.001
c2	1	0.536	0.464	0	0	0	0
c3	1	2.404	0.121	0.001	0.001	0	0
c4	1	0.106	0.745	0	0	-0.001	-0.001
c5	1	0.09	0.764	0	0	-0.001	-0.001
Critical Ratios for Differences between Parameters (Unconstrained)
	a1_1	a2_1	a3_1	a4_1	a5_1	a6_1	a7_1	a8_1	a9_1	a10_1	a11_1	a12_1	a13_1	a14_1	a15_1	a16_1	a17_1	ccc1_1	c1_1	c2_1	c3_1	c4_1	c5_1	v1_1	v2_1	v3_1	v4_1	v5_1	v6_1	v7_1	vvv1_1	v8_1	v9_1	v10_1	v11_1	v12_1	v13_1	v14_1	v15_1	v16_1	v17_1	v18_1	v19_1	vvv2_1	a1_2	a2_2	a3_2	a4_2	a5_2
a1_1	0
a2_1	1.199	0
a3_1	1.016	-0.187	0
a4_1	0.94	-0.407	-0.19	0
a5_1	0.804	-0.537	-0.322	-0.156	0
a6_1	1.526	0.415	0.585	0.847	0.96	0
a7_1	-0.729	-1.68	-1.545	-1.511	-1.41	-1.905	0
a8_1	-0.355	-1.313	-1.178	-1.122	-1.022	-1.55	0.754	0
a9_1	0.172	-0.735	-0.609	-0.521	-0.429	-1.077	1.713	1.168	0
a10_1	-0.294	-1.239	-1.106	-1.046	-0.947	-1.476	0.837	0.126	-1.004	0
a11_1	-0.555	-1.537	-1.398	-1.356	-1.252	-1.772	0.395	-0.457	-1.632	-0.566	0
a12_1	-0.164	-1.084	-0.956	-0.887	-0.792	-1.321	1.024	0.382	-0.691	0.255	0.798	0
a13_1	-0.291	-1.237	-1.104	-1.044	-0.945	-1.475	0.85	0.135	-1.005	0.008	0.58	-0.25	0
a14_1	-1.049	-2.05	-2.123	-2.032	-1.789	-2.272	-0.533	-1.442	-2.431	-1.503	-1.076	-1.659	-1.523	0
a15_1	-0.574	-1.529	-1.394	-1.35	-1.371	-1.759	0.296	-0.467	-1.506	-0.565	-0.072	-0.777	-0.577	0.887	0
a16_1	0.103	-0.8	-0.674	-0.591	-0.499	-1.041	1.531	0.968	-0.144	0.819	1.404	0.53	0.818	2.205	1.651	0
a17_1	0.502	-0.374	-0.253	-0.148	-0.061	-0.62	2.301	1.877	0.734	1.696	2.333	1.359	1.703	3.02	2.14	0.843	0
ccc1_1	-1.396	-2.108	-2.01	-1.989	-1.916	-2.271	-0.918	-1.261	-1.659	-1.298	-1.114	-1.382	-1.302	-0.693	-1.063	-1.594	-1.905	0
c1_1	-5.145	-6.508	-6.294	-6.708	-6.497	-6.593	-5.535	-6.406	-6.633	-6.309	-6.388	-6.188	-6.342	-5.628	-5.866	-6.443	-6.779	-3.145	0
c2_1	-4.862	-6.191	-5.983	-6.355	-6.181	-6.241	-5.137	-5.964	-6.186	-5.887	-5.92	-5.795	-5.916	-5.172	-5.487	-6.057	-6.406	-2.877	0.559	0
c3_1	-4.947	-6.29	-6.065	-6.477	-6.289	-6.381	-5.26	-6.105	-6.359	-6.021	-6.07	-5.919	-6.051	-5.29	-5.616	-6.179	-6.524	-2.951	0.44	-0.133	0
c4_1	-5.466	-6.864	-6.656	-7.092	-6.913	-6.931	-5.988	-6.905	-7.076	-6.788	-6.919	-6.633	-6.823	-6.123	-6.374	-6.879	-7.197	-3.454	-0.804	-1.325	-1.274	0
c5_1	-5.217	-6.575	-6.363	-6.777	-6.592	-6.662	-5.616	-6.48	-6.706	-6.384	-6.463	-6.263	-6.416	-5.713	-5.928	-6.469	-6.848	-3.231	-0.272	-0.786	-0.678	0.47	0
v1_1	-4.025	-5.315	-5.118	-5.404	-5.24	-5.449	-3.974	-4.719	-5.098	-4.682	-4.615	-4.655	-4.705	-3.889	-4.29	-4.938	-5.325	-1.988	2.325	1.714	1.888	3.1	2.488	0
v2_1	-2.401	-3.5	-3.344	-3.431	-3.309	-3.685	-2.004	-2.557	-3.056	-2.582	-2.381	-2.653	-2.593	-1.755	-2.237	-2.943	-3.358	-0.6	3.547	3.122	3.249	4.043	3.657	1.858	0
v3_1	-2.315	-3.363	-3.21	-3.285	-3.166	-3.552	-1.888	-2.442	-2.952	-2.469	-2.26	-2.545	-2.48	-1.629	-2.12	-2.839	-3.262	-0.492	3.6	3.189	3.311	4.077	3.703	1.959	0.124	0
v4_1	-3.181	-4.34	-4.166	-4.335	-4.196	-4.504	-2.886	-3.565	-4.02	-3.565	-3.414	-3.596	-3.581	-2.736	-3.195	-3.887	-4.295	-1.267	3.061	2.553	2.702	3.668	3.186	1.085	-0.842	-0.959	0
v5_1	-4.527	-5.846	-5.642	-5.986	-5.816	-5.959	-4.711	-5.456	-5.834	-5.459	-5.462	-5.385	-5.486	-4.709	-5.056	-5.657	-6.023	-2.524	1.487	0.842	1.012	2.353	1.686	-0.982	-2.625	-2.704	-1.959	0
v6_1	-4.13	-5.33	-5.21	-5.498	-5.336	-5.532	-4.169	-4.927	-5.291	-4.883	-4.832	-4.846	-4.907	-4.106	-4.492	-5.126	-5.507	-2.15	2.056	1.448	1.618	2.835	2.23	-0.27	-2.065	-2.162	-1.323	0.7	0
v7_1	-3.985	-5.239	-5.05	-5.318	-5.16	-5.3	-3.973	-4.71	-5.047	-4.675	-4.605	-4.65	-4.697	-3.888	-4.287	-4.931	-5.318	-2.015	2.22	3.062	1.799	2.964	2.386	-0.041	-1.87	-1.97	-1.106	0.915	0.223	0
vvv1_1	-1.957	-2.625	-2.533	-2.532	-2.463	-2.767	-1.959	-2.425	-2.88	-2.453	-2.262	-2.529	-2.462	-1.728	-2.155	-2.787	-3.163	-1.843	2.416	2.128	2.207	2.754	2.512	1.165	-0.248	-0.349	0.421	1.735	1.338	1.197	0
v8_1	-4.189	-5.467	-5.271	-5.567	-5.405	-5.552	-4.247	-5.012	-5.296	-4.966	-4.922	-4.924	-4.99	-4.187	-4.571	-5.202	-5.582	-2.206	1.961	2.597	1.52	2.744	2.132	-0.375	-2.149	-2.24	-1.415	0.592	-0.104	-0.412	-1.399	0
v9_1	-4.207	-5.489	-5.292	-5.592	-5.429	-5.615	-4.273	-5.043	-5.395	-4.93	-4.954	-4.951	-5.02	-4.217	-4.599	-5.229	-5.608	-2.219	1.973	1.353	1.524	2.771	2.145	-0.394	-2.171	-2.261	-1.438	0.584	-0.12	-0.344	-1.411	-0.015	0
v10_1	-4.798	-6.147	-5.937	-6.319	-6.142	-6.247	-5.085	-5.937	-6.207	-5.854	-5.828	-5.755	-5.885	-5.133	-5.446	-6.021	-6.374	-2.783	0.996	0.34	0.503	1.915	1.226	-1.536	-3.023	-3.089	-2.428	-0.573	-1.25	-1.451	-2.014	-1.141	-1.141	0
v11_1	-3.658	-4.874	-4.69	-4.916	-4.766	-5.022	-3.54	-4.237	-4.651	-4.217	-4.111	-4.159	-4.237	-3.405	-3.834	-4.503	-4.9	-1.707	2.606	2.048	2.208	3.29	2.748	0.456	-1.438	-1.545	-0.631	1.384	0.711	0.487	-0.876	0.808	0.829	1.894	0
v12_1	-4.277	-5.567	-5.369	-5.678	-5.513	-5.69	-4.368	-5.148	-5.491	-5.096	-5.064	-5.045	-5.055	-4.323	-4.698	-5.322	-5.699	-2.286	1.874	1.248	1.419	2.687	2.051	-0.517	-2.268	-2.357	-1.549	0.464	-0.241	-0.463	-1.482	-0.135	-0.121	1.026	-0.946	0
v13_1	-3.829	-5.065	-4.808	-5.126	-4.973	-5.207	-3.765	-4.484	-4.882	-4.456	-4.368	-4.443	-4.477	-3.623	-4.071	-4.727	-5.118	-1.867	2.419	1.843	3.345	3.128	2.577	0.206	-1.66	-1.765	-0.873	1.154	0.466	0.242	-1.042	0.568	0.588	1.679	-0.247	0.706	0
v14_1	-4.096	-5.375	-5.173	-5.467	-5.307	-5.504	-4.133	-4.9	-5.26	-4.855	-4.805	-4.816	-4.879	-4.027	-4.455	-5.098	-5.482	-2.1	2.278	1.633	2.937	4.054	2.439	-0.155	-2.007	-2.103	-1.244	0.859	0.125	-0.109	-1.28	0.233	0.251	1.439	-0.613	0.377	-0.421	0
v15_1	-4.774	-6.119	-5.911	-6.21	-6.113	-6.221	-5.05	-5.897	-6.174	-5.816	-5.854	-5.72	-5.846	-5.065	-5.413	-5.986	-6.34	-2.764	1.02	0.372	0.532	2.84	1.252	-1.487	-2.987	-3.058	-2.39	-0.53	-1.202	-1.402	-1.993	-1.1	-1.098	0.04	-1.854	-0.982	-1.632	-1.497	0
v16_1	-4.539	-5.859	-5.657	-6.002	-5.756	-5.971	-4.726	-5.542	-5.852	-5.475	-5.479	-5.401	-5.503	-4.733	-5.035	-5.672	-6.037	-2.536	2.518	0.818	0.989	2.331	1.668	-1.005	-2.641	-2.722	-1.982	-0.025	-0.723	-0.937	-1.748	-0.618	-0.61	0.548	-1.408	-0.49	-1.174	-0.886	0.503	0
v17_1	-3.786	-5.027	-4.839	-5.087	-4.915	-5.17	-3.717	-4.44	-4.84	-4.412	-4.323	-4.399	-4.433	-3.602	-3.974	-4.672	-5.08	-1.814	3.881	2.007	2.178	3.354	3.703	0.325	-1.592	-1.697	-0.786	1.302	0.592	0.359	-0.98	0.695	0.716	1.848	-0.143	0.839	0.11	0.486	1.804	1.524	0
v18_1	-3.814	-5.048	-4.86	-5.106	-4.953	-5.19	-3.745	-4.461	-4.859	-4.434	-4.344	-4.422	-4.455	-3.63	-4.022	-4.642	-5.098	-1.855	2.423	1.85	2.013	3.131	3.777	0.222	-1.643	-1.746	-0.854	1.162	0.482	0.258	-1.029	0.581	0.601	1.683	-0.229	0.719	0.017	0.376	1.642	1.187	-0.101	0
v19_1	-4.007	-5.261	-5.07	-5.339	-5.182	-5.396	-3.999	-4.738	-5.115	-4.701	-4.634	-4.675	-4.724	-3.911	-4.312	-4.957	-5.269	-2.037	2.167	1.581	1.746	2.902	2.326	-0.085	-1.902	-1.998	-1.14	0.863	0.179	-0.043	-1.222	0.28	0.297	1.393	-0.526	0.416	-0.284	0.063	1.353	0.889	-0.401	-0.298	0
vvv2_1	-0.448	-1.087	-0.999	-0.942	-0.879	-1.257	0.048	-0.184	-0.489	-0.217	-0.071	-0.29	-0.219	0.227	-0.05	-0.448	-0.681	1.579	2.93	2.767	2.811	3.118	2.989	2.205	1.261	1.173	1.725	2.535	2.3	2.215	1.68	2.337	2.344	2.695	2.017	2.386	2.12	2.266	2.683	2.542	2.084	2.112	2.23	0
a1_2	0.129	-0.885	-0.743	-0.658	-0.552	-1.149	1.127	0.641	-0.072	0.553	0.927	0.37	0.55	1.607	0.927	0.017	-0.5	2.108	8.786	8.128	8.354	9.53	8.829	6.483	3.568	3.366	4.886	7.617	6.756	6.446	3.206	6.872	6.925	8.218	5.793	7.074	6.133	6.762	8.151	7.64	6.105	6.098	6.476	0.595	0
a2_2	1.486	0.538	0.667	0.845	0.938	0.238	2.736	2.311	1.52	2.194	2.637	1.961	2.195	3.305	2.564	1.592	1.044	3.464	10.609	9.953	10.184	11.336	10.635	8.339	5.244	5.021	6.668	9.481	8.609	8.29	4.636	8.726	8.784	10.079	7.617	8.935	7.97	8.634	10.011	9.504	7.957	7.932	8.318	1.565	2.948	0
a3_2	1.64	0.686	0.816	1.007	1.1	0.379	2.947	2.523	1.704	2.399	2.863	2.154	2.401	3.545	2.776	1.776	1.214	3.647	11.233	10.524	10.777	12.021	11.248	8.819	5.532	5.297	7.035	10.042	9.104	8.761	4.853	9.228	9.292	10.687	8.044	9.454	8.42	9.141	10.611	10.066	8.413	8.379	8.79	1.672	3.477	0.351	0
a4_2	1.493	0.536	0.667	0.848	0.941	0.234	2.765	2.337	1.532	2.216	2.669	1.979	2.218	3.348	2.592	1.604	1.049	3.492	10.915	10.221	10.467	11.686	10.934	8.541	5.323	5.093	6.795	9.739	8.822	8.486	4.682	8.943	9.006	10.371	7.784	9.164	8.152	8.854	10.297	9.764	8.142	8.112	8.515	1.568	3.068	-0.016	-0.392	0
a5_2	1.245	0.289	0.42	0.582	0.676	-0.003	2.443	2.011	1.238	1.899	2.327	1.677	1.9	2.993	2.268	1.312	0.772	3.215	10.171	9.53	9.754	10.884	10.203	7.938	4.921	4.704	6.308	9.056	8.204	7.893	4.366	8.318	8.374	9.642	7.235	8.522	7.58	8.224	9.575	9.079	7.563	7.543	7.921	1.392	2.365	-0.547	-0.929	-0.559	0
a6_2	1.373	0.415	0.546	0.718	0.812	0.117	2.615	2.183	1.39	2.066	2.509	1.835	2.068	3.184	2.44	1.464	0.915	3.363	10.622	9.946	10.184	11.375	10.646	8.293	5.145	4.92	6.587	9.465	8.569	8.242	4.539	8.688	8.748	10.082	7.554	8.904	7.915	8.596	10.01	9.489	7.902	7.876	8.27	1.483	2.739	-0.293	-0.681	-0.294	0.275
a7_2	-0.71	-1.791	-1.636	-1.618	-1.499	-2.035	0.138	-0.407	-1.084	-0.477	-0.142	-0.63	-0.484	0.572	-0.087	-0.98	-1.486	1.31	8.233	7.476	7.736	9.105	8.274	5.645	2.622	2.425	3.954	6.904	5.945	5.607	2.392	6.073	6.132	7.59	4.905	6.297	5.269	5.95	7.512	6.931	5.234	5.232	5.641	0.016	-1.258	-3.237	-3.528	-3.296	-2.874
a8_2	0.192	-0.877	-0.727	-0.638	-0.525	-1.154	1.289	0.77	-0.011	0.669	1.089	0.466	0.667	1.837	1.077	0.085	-0.47	2.285	10.882	9.902	10.255	12.012	10.861	7.743	4.015	3.775	5.633	9.316	8.096	7.666	3.485	8.252	8.337	10.194	6.798	8.545	7.249	8.154	10.085	9.349	7.244	7.199	7.701	0.649	0.085	-2.036	-2.309	-2.073	-1.66
a9_2	-0.208	-1.291	-1.137	-1.081	-0.965	-1.555	0.787	0.25	-0.492	0.162	0.549	-0.02	0.158	1.291	0.566	-0.391	-0.929	1.869	9.99	9.061	9.391	11.067	9.988	6.969	3.444	3.218	4.974	8.468	7.31	6.904	3.029	7.459	7.537	9.303	6.079	7.735	6.507	7.352	9.201	8.499	6.491	6.461	6.939	0.372	-0.524	-2.611	-2.9	-2.661	-2.235
a10_2	-0.271	-1.363	-1.208	-1.157	-1.04	-1.625	0.715	0.171	-0.571	0.084	0.47	-0.096	0.08	1.219	0.492	-0.468	-1.007	1.816	10.108	9.138	9.484	11.236	10.098	6.986	3.393	3.165	4.943	8.535	7.336	6.918	2.98	7.49	7.571	9.404	6.071	7.775	6.51	7.382	9.297	8.567	6.496	6.462	6.953	0.33	-0.626	-2.731	-3.028	-2.785	-2.351
a11_2	-0.039	-1.113	-0.961	-0.891	-0.776	-1.381	0.994	0.467	-0.287	0.374	0.772	0.184	0.371	1.513	0.778	-0.189	-0.732	2.038	10.219	9.295	9.624	11.284	10.214	7.215	3.662	3.433	5.209	8.71	7.555	7.148	3.209	7.703	7.782	9.54	6.321	7.979	6.75	7.599	9.439	8.741	6.737	6.703	7.182	0.489	-0.265	-2.353	-2.632	-2.396	-1.979
a12_2	-0.005	-1.073	-0.922	-0.849	-0.736	-1.342	1.032	0.508	-0.245	0.416	0.814	0.225	0.412	1.55	0.817	-0.148	-0.69	2.066	10.144	9.243	9.563	11.182	10.144	7.197	3.686	3.459	5.22	8.664	7.532	7.132	3.234	7.678	7.755	9.475	6.318	7.948	6.741	7.573	9.376	8.694	6.727	6.695	7.167	0.512	-0.211	-2.288	-2.563	-2.329	-1.917
a13_2	-0.237	-1.319	-1.165	-1.111	-0.995	-1.581	0.747	0.21	-0.526	0.124	0.507	-0.056	0.119	1.246	0.527	-0.425	-0.961	1.834	9.835	8.925	9.247	10.887	9.837	6.863	3.388	3.165	4.899	8.335	7.2	6.801	2.988	7.347	7.422	9.153	5.989	7.616	6.41	7.237	9.054	8.366	6.393	6.365	6.836	0.351	-0.567	-2.643	-2.931	-2.693	-2.268
a14_2	0.105	-0.973	-0.821	-0.74	-0.625	-1.248	1.187	0.661	-0.117	0.562	0.979	0.362	0.559	1.732	0.972	-0.02	-0.574	2.205	10.917	9.906	10.27	12.088	10.89	7.699	3.925	3.685	5.556	9.31	8.059	7.62	3.405	8.218	8.305	10.215	6.736	8.518	7.195	8.12	10.102	9.343	7.19	7.144	7.655	0.59	-0.049	-2.183	-2.623	-2.408	-1.803
a15_2	0.091	-0.98	-0.829	-0.749	-0.635	-1.253	1.16	0.637	-0.132	0.54	0.95	0.343	0.537	1.695	0.946	-0.035	-0.585	2.177	10.587	9.633	9.975	11.688	10.574	7.51	3.86	3.625	5.446	9.047	7.856	7.437	3.364	8.009	8.091	9.904	6.587	8.294	7.029	7.908	9.798	9.079	7.02	6.98	7.471	0.579	-0.068	-2.175	-2.451	-2.214	-1.993
a16_2	0.004	-1.043	-0.895	-0.821	-0.71	-1.309	1.012	0.503	-0.229	0.413	0.797	0.228	0.41	1.508	0.803	-0.135	-0.664	2.033	9.387	8.614	8.884	10.269	9.413	6.77	3.563	3.349	4.988	8.065	7.074	6.72	3.165	7.205	7.269	8.766	5.988	7.44	6.37	7.096	8.684	8.092	6.347	6.329	6.753	0.512	-0.191	-2.19	-2.449	-2.225	-1.833
a17_2	0.271	-0.769	-0.623	-0.528	-0.419	-1.043	1.345	0.846	0.089	0.749	1.154	0.55	0.746	1.87	1.141	0.18	-0.361	2.313	9.99	9.182	9.467	10.908	10.004	7.289	3.946	3.722	5.43	8.635	7.601	7.232	3.474	7.737	7.805	9.365	6.471	7.983	6.868	7.633	9.278	8.662	6.851	6.825	7.265	0.7	0.204	-1.821	-2.073	-1.849	-1.463
ccc1_2	1.203	0.633	0.709	0.8	0.854	0.457	1.771	1.526	1.148	1.48	1.666	1.381	1.478	1.995	1.669	1.192	0.903	2.349	4.498	4.344	4.387	4.672	4.549	3.828	2.91	2.834	3.365	4.137	3.915	3.834	2.91	3.949	3.957	4.287	3.646	3.997	3.744	3.888	4.275	4.144	3.714	3.736	3.848	1.4	1.165	0.317	0.235	0.322	0.464
c1_2	-5.064	-6.422	-6.21	-6.615	-6.436	-6.511	-5.428	-6.292	-6.531	-6.2	-6.269	-6.085	-6.231	-5.51	-5.795	-6.342	-6.682	-3.062	0.219	-0.359	-0.23	1.042	0.477	-2.144	-3.427	-3.483	-2.916	-1.281	-1.873	-2.046	-2.324	-1.777	-1.785	-0.773	-2.444	-1.682	-2.251	-2.083	-0.801	-1.257	-2.432	-2.254	-1.993	-2.876	-8.641	-10.471	-11.09	-10.773	-9.968
c2_2	-5.205	-6.567	-6.354	-6.771	-6.59	-6.651	-5.607	-6.477	-6.701	-6.38	-6.462	-6.257	-6.412	-5.707	-5.977	-6.51	-6.843	-3.211	-0.194	-0.73	-0.618	0.574	0.077	-2.461	-3.638	-3.688	-3.169	-1.651	-2.199	-2.357	-2.49	-2.107	-2.119	-1.178	-2.729	-2.024	-2.55	-2.418	-1.2	-1.628	-2.735	-2.551	-2.303	-2.974	-8.856	-10.669	-11.292	-10.975	-10.233
c3_2	-5.553	-6.966	-6.742	-7.221	-7.029	-7.031	-6.122	-7.059	-7.216	-6.933	-7.086	-6.766	-6.97	-6.308	-6.521	-7.009	-7.322	-3.536	-1.036	-1.549	-1.473	-0.212	-0.671	-3.349	-4.188	-4.217	-3.854	-2.643	-3.086	-3.201	-2.839	-2.999	-3.034	-2.227	-3.507	-2.955	-3.365	-3.384	-2.227	-2.619	-3.597	-3.357	-3.14	-3.162	-9.792	-11.596	-12.258	-11.967	-11.136
c4_2	-5.385	-6.783	-6.562	-7.018	-6.83	-6.856	-5.888	-6.804	-6.987	-6.688	-6.814	-6.537	-6.724	-6.04	-6.277	-6.786	-7.108	-3.368	-0.534	-1.091	-0.99	0.327	-0.209	-2.916	-3.923	-3.962	-3.526	-2.135	-2.647	-2.786	-2.656	-2.555	-2.579	-1.668	-3.13	-2.49	-2.967	-2.915	-1.681	-2.111	-3.183	-2.964	-2.727	-3.06	-9.423	-11.242	-11.93	-11.536	-10.788
c5_2	-5.098	-6.449	-6.238	-6.64	-6.462	-6.538	-5.459	-6.315	-6.554	-6.224	-6.29	-6.111	-6.255	-5.538	-5.823	-6.367	-6.705	-3.107	0.048	-0.496	-0.377	0.815	0.304	-2.222	-3.477	-3.532	-2.975	-1.39	-1.959	-2.126	-2.377	-1.865	-1.873	-0.906	-2.513	-1.775	-2.325	-2.164	-0.932	-1.366	-2.502	-2.329	-2.074	-2.91	-8.621	-10.437	-11.042	-10.73	-10.005
v1_2	-4.287	-5.589	-5.388	-5.705	-5.538	-5.709	-4.393	-5.186	-5.524	-5.13	-5.106	-5.075	-5.156	-4.355	-4.728	-5.353	-5.729	-2.28	2.02	1.353	1.536	2.903	2.201	-0.489	-2.274	-2.364	-1.548	0.536	-0.203	-0.434	-1.471	-0.094	-0.079	1.134	-0.933	0.048	-0.685	-0.344	1.084	0.562	-0.822	-0.699	-0.386	-2.379	-7.23	-9.13	-9.68	-9.378	-8.704
v2_2	-3.604	-4.826	-4.64	-4.866	-4.716	-4.974	-3.478	-4.18	-4.598	-4.16	-4.052	-4.161	-4.18	-3.339	-3.774	-4.449	-4.85	-1.64	2.838	2.253	2.422	3.561	2.979	0.607	-1.349	-1.46	-0.52	1.575	0.869	0.636	-0.798	0.972	0.995	2.111	0.132	1.117	0.387	0.774	2.064	1.598	0.284	0.369	0.677	-1.971	-5.703	-7.597	-8.031	-7.767	-7.211
v3_2	-3.821	-5.068	-4.878	-5.131	-4.976	-5.208	-3.764	-4.493	-4.888	-4.463	-4.379	-4.447	-4.485	-3.654	-4.072	-4.733	-5.127	-1.844	2.591	1.983	2.157	3.356	2.742	0.28	-1.636	-1.741	-0.833	1.268	0.55	0.316	-1.012	0.655	0.676	1.822	-0.189	0.8	0.065	0.443	1.774	1.292	-0.047	0.048	0.359	-2.103	-6.185	-8.041	-8.505	-8.231	-7.645
v4_2	-2.463	-3.543	-3.384	-3.478	-3.354	-3.728	-2.037	-2.603	-3.104	-2.626	-2.425	-2.696	-2.638	-1.787	-2.274	-2.988	-3.407	-0.605	3.687	3.241	3.373	4.212	3.795	1.923	0.003	-0.123	0.867	2.725	2.139	1.935	0.254	2.225	2.248	3.143	1.484	2.351	1.716	2.078	3.106	2.743	1.645	1.697	1.967	-1.267	-3.65	-5.358	-5.657	-5.443	-5.027
v5_2	-4.551	-5.877	-5.671	-6.021	-5.849	-5.986	-4.748	-5.57	-5.874	-5.502	-5.51	-5.424	-5.53	-4.753	-5.097	-5.696	-6.061	-2.541	1.506	0.843	1.017	2.407	1.709	-1.017	-2.659	-2.738	-1.999	-0.02	-0.731	-0.949	-1.752	-0.624	-0.615	0.568	-1.423	-0.493	-1.189	-0.895	0.523	0.006	-1.341	-1.2	-0.898	-2.544	-7.701	-9.572	-10.144	-9.837	-9.144
v6_2	-4.185	-5.47	-5.272	-5.572	-5.409	-5.595	-4.249	-5.022	-5.375	-4.974	-4.933	-4.929	-4.998	-4.192	-4.576	-5.209	-5.589	-2.19	2.089	1.452	1.628	2.917	2.262	-0.33	-2.135	-2.229	-1.394	0.672	-0.051	-0.28	-1.378	0.056	0.072	1.246	-0.776	0.196	-0.528	-0.182	1.198	0.697	-0.658	-0.543	-0.234	-2.324	-6.918	-8.705	-9.3	-9.011	-8.374
v7_2	-4.351	-5.655	-5.454	-5.777	-5.609	-5.774	-4.475	-5.271	-5.602	-5.213	-5.195	-5.154	-5.24	-4.446	-4.812	-5.43	-5.804	-2.348	1.846	1.193	1.37	2.71	2.031	-0.629	-2.37	-2.457	-1.662	0.376	-0.347	-0.572	-1.546	-0.239	-0.226	0.96	-1.061	-0.102	-0.818	-0.491	0.913	0.401	-0.957	-0.831	-0.524	-2.424	-7.274	-9.145	-9.685	-9.388	-8.725
vvv1_2	0.331	-0.306	-0.219	-0.142	-0.08	-0.488	0.904	0.624	0.222	0.578	0.774	0.477	0.576	1.139	0.788	0.273	-0.037	1.579	3.922	3.749	3.797	4.12	3.98	3.167	2.154	2.073	2.653	3.514	3.265	3.175	2.182	3.304	3.312	3.683	2.964	3.357	3.074	3.234	3.67	3.522	3.039	3.065	3.19	0.663	0.247	-0.621	-0.708	-0.619	-0.47
v8_2	-4.061	-5.334	-5.139	-5.423	-5.262	-5.464	-4.084	-4.842	-5.21	-4.8	-4.744	-4.765	-4.824	-4.008	-4.404	-5.047	-5.432	-2.072	2.271	1.643	1.818	3.078	2.435	-0.115	-1.963	-2.061	-1.199	0.885	0.161	-0.07	-1.253	0.268	0.286	1.454	-0.571	0.411	-0.32	0.039	1.406	0.909	-0.443	-0.336	-0.025	-2.249	-6.667	-8.533	-9.029	-8.745	-8.126
v9_2	-4.335	-5.639	-5.437	-5.759	-5.592	-5.758	-4.455	-5.25	-5.582	-5.193	-5.172	-5.134	-5.219	-4.423	-4.791	-5.411	-5.785	-2.332	1.888	1.232	1.41	2.756	2.072	-0.595	-2.346	-2.434	-1.634	0.415	-0.311	-0.538	-1.528	-0.203	-0.19	1.002	-1.029	-0.065	-0.785	-0.455	0.954	0.441	-0.924	-0.799	-0.49	-2.413	-7.248	-9.121	-9.66	-9.364	-8.701
v10_2	-4.063	-5.335	-5.14	-5.424	-5.263	-5.465	-4.085	-4.843	-5.211	-4.801	-4.745	-4.767	-4.825	-4.009	-4.405	-5.048	-5.433	-2.074	2.264	1.637	1.812	3.07	2.429	-0.118	-1.965	-2.063	-1.202	0.88	0.157	-0.074	-1.255	0.264	0.282	1.448	-0.574	0.406	-0.323	0.036	1.4	0.905	-0.446	-0.339	-0.029	-2.25	-6.668	-8.532	-9.028	-8.745	-8.126
v11_2	-3.893	-5.146	-4.955	-5.216	-5.06	-5.283	-3.858	-4.594	-4.982	-4.561	-4.484	-4.54	-4.583	-3.758	-4.169	-4.825	-5.215	-1.915	2.473	1.865	2.037	3.242	2.628	0.155	-1.736	-1.839	-0.946	1.141	0.425	0.193	-1.087	0.53	0.55	1.695	-0.308	0.674	-0.056	0.315	1.647	1.165	-0.171	-0.073	0.237	-2.149	-6.317	-8.174	-8.645	-8.369	-7.776
v12_2	-3.9	-5.154	-4.962	-5.225	-5.068	-5.291	-3.867	-4.605	-4.992	-4.571	-4.496	-4.55	-4.594	-3.768	-4.179	-4.834	-5.225	-1.92	2.477	1.866	2.039	3.252	2.633	0.15	-1.743	-1.846	-0.953	1.139	0.421	0.188	-1.092	0.526	0.546	1.696	-0.315	0.67	-0.062	0.309	1.648	1.163	-0.177	-0.079	0.231	-2.152	-6.336	-8.194	-8.667	-8.391	-7.795
v13_2	-4.858	-6.215	-6.003	-6.395	-6.216	-6.311	-5.171	-6.033	-6.292	-5.946	-6	-5.841	-5.977	-5.232	-5.537	-6.104	-6.454	-2.838	0.898	0.234	0.395	1.844	1.138	-1.666	-3.115	-3.18	-2.54	-0.707	-1.379	-1.577	-2.074	-1.274	-1.275	-0.129	-2.017	-1.16	-1.803	-1.579	-0.169	-0.681	-1.978	-1.809	-1.523	-2.728	-8.368	-10.23	-10.759	-10.532	-9.789
v14_2	-4.752	-6.105	-5.894	-6.277	-6.099	-6.205	-5.034	-5.891	-6.163	-5.808	-5.851	-5.709	-5.839	-5.081	-5.398	-5.976	-6.331	-2.727	1.218	0.52	0.695	2.209	1.446	-1.42	-2.954	-3.024	-2.346	-0.419	-1.127	-1.336	-1.95	-1.018	-1.016	0.188	-1.798	-0.895	-1.572	-1.318	0.144	-0.392	-1.743	-1.581	-1.283	-2.656	-8.198	-10.073	-10.669	-10.345	-9.631
v15_2	-4.605	-5.936	-5.729	-6.087	-5.914	-6.043	-4.822	-5.651	-5.947	-5.579	-5.596	-5.497	-5.608	-4.837	-5.174	-5.768	-6.13	-2.592	1.411	0.746	0.918	2.323	1.62	-1.125	-2.737	-2.814	-2.091	-0.131	-0.839	-1.053	-1.808	-0.731	-0.724	0.458	-1.523	-0.603	-1.291	-1.008	0.413	-0.105	-1.448	-1.302	-1.002	-2.576	-7.819	-9.689	-10.269	-9.872	-9.258
v16_2	-3.871	-5.121	-4.93	-5.189	-5.033	-5.259	-3.828	-4.562	-4.952	-4.529	-4.45	-4.511	-4.551	-3.725	-4.138	-4.795	-5.187	-1.894	2.502	1.895	2.067	3.267	2.656	0.191	-1.705	-1.809	-0.912	1.176	0.461	0.229	-1.065	0.566	0.586	1.728	-0.274	0.709	-0.021	0.351	1.68	1.199	-0.134	-0.038	0.272	-2.135	-6.273	-8.128	-8.596	-8.322	-7.658
v17_2	-4.355	-5.666	-5.464	-5.791	-5.623	-5.784	-4.488	-5.292	-5.62	-5.232	-5.218	-5.17	-5.259	-4.463	-4.828	-5.447	-5.82	-2.344	1.938	1.258	1.443	2.847	2.124	-0.61	-2.37	-2.458	-1.658	0.421	-0.322	-0.552	-1.538	-0.211	-0.198	1.027	-1.049	-0.07	-0.802	-0.468	0.977	0.448	-0.944	-0.816	-0.503	-2.418	-7.332	-9.213	-9.764	-9.463	-8.755
v18_2	-2.693	-3.8	-3.636	-3.753	-3.624	-3.978	-2.318	-2.907	-3.396	-2.924	-2.737	-2.982	-2.937	-2.085	-2.566	-3.275	-3.691	-0.815	3.513	3.047	3.185	4.066	3.627	1.676	-0.258	-0.383	0.605	2.506	1.901	1.691	0.042	1.989	2.013	2.943	1.23	2.118	1.467	1.835	2.904	2.525	1.391	1.448	1.724	-1.415	-4.039	-5.774	-6.094	-5.872	-5.433
v19_2	-3.105	-4.262	-4.089	-4.252	-4.114	-4.428	-2.832	-3.468	-3.93	-3.47	-3.314	-3.506	-3.486	-2.635	-3.1	-3.798	-4.208	-1.188	3.212	2.7	2.85	3.827	3.336	1.219	-0.738	-0.858	0.118	2.106	1.459	1.239	-0.336	1.554	1.577	2.582	0.758	1.69	1.003	1.383	2.54	2.127	0.918	0.985	1.275	-1.671	-4.775	-6.562	-6.927	-6.687	-6.202
vvv2_2	1.853	1.406	1.465	1.544	1.585	1.263	2.304	2.115	1.82	2.079	2.223	2.001	2.078	2.476	2.225	1.854	1.627	2.758	4.342	4.231	4.261	4.468	4.381	3.85	3.176	3.119	3.512	4.075	3.914	3.856	3.193	3.939	3.945	4.183	3.718	3.973	3.79	3.892	4.175	4.08	3.766	3.784	3.866	1.982	1.901	1.213	1.148	1.219	1.333
Multigroup analysis of (Model 17) 2F 12 items with correlated errors
Critical Ratios for Differences between Parameters (Unconstrained)
	a1_1	a2_1	a3_1	a4_1	a5_1	a6_1	a7_1	a8_1	a9_1	a10_1	ccc1_1	c1_1	c2_1	c3_1	c4_1	v1_1	v2_1	v3_1	vvv1_1	v4_1	v5_1	v6_1	v7_1	v8_1	v9_1	v10_1	v11_1	v12_1	vvv2_1	a1_2	a2_2	a3_2	a4_2	a5_2	a6_2	a7_2	a8_2	a9_2	a10_2	ccc1_2	c1_2	c2_2	c3_2	c4_2	v1_2	v2_2	v3_2	vvv1_2	v4_2
a1_1	0
a2_1	0.668	0
a3_1	1.266	0.638	0
a4_1	1.368	0.659	-0.103	0
a5_1	1.366	0.672	-0.054	0.044	0
a6_1	-1.212	-1.804	-2.255	-2.422	-2.404	0
a7_1	-1.869	-2.468	-3.253	-3.271	-3.112	-1.625	0
a8_1	-1.299	-1.892	-2.342	-2.515	-2.646	-0.23	1.386	0
a9_1	-0.841	-1.423	-1.876	-1.997	-1.988	0.891	2.383	1.095	0
a10_1	-0.635	-1.208	-1.66	-1.755	-1.75	1.31	2.698	1.496	0.452	0
ccc1_1	-1.208	-1.589	-1.883	-1.925	-1.925	-0.549	0.1	-0.461	-0.888	-1.066	0
c1_1	-4.516	-5.157	-5.554	-6.17	-6.051	-6.715	-5.329	-6.488	-7.005	-7.017	-2.877	0
c2_1	-6.532	-7.202	-7.487	-8.362	-8.195	-11.762	-10.459	-11.443	-11.637	-11.324	-5.065	-5.816	0
c3_1	-5.238	-5.897	-6.267	-6.958	-6.801	-8.735	-7.376	-8.27	-8.855	-8.725	-3.646	-2.003	5.317	0
c4_1	-5.427	-6.092	-6.52	-7.249	-7.109	-9.412	-8.018	-9.141	-9.458	-9.268	-3.821	-2.984	4.815	-0.658	0
v1_1	-3.58	-4.197	-4.615	-5.036	-4.979	-4.415	-3.229	-4.238	-4.837	-4.976	-1.915	1.852	6.666	3.544	4.168	0
v2_1	-2.462	-3.034	-3.452	-3.696	-3.669	-2.157	-1.171	-2.018	-2.615	-2.826	-0.855	2.963	6.364	4.175	4.596	1.451	0
v3_1	-3.284	-3.876	-4.313	-4.678	-4.633	-3.752	-2.623	-3.588	-4.194	-4.361	-1.636	2.199	6.475	3.713	4.314	0.43	-1.047	0
vvv1_1	-2.207	-2.576	-2.844	-2.937	-2.927	-2.442	-1.63	-2.326	-2.828	-3.012	-3.57	1.608	4.245	2.515	2.732	0.502	-0.604	0.203	0
v4_1	-3.94	-4.561	-4.958	-5.429	-5.361	-5.409	-4.133	-5.209	-5.802	-5.897	-2.285	1.084	6.213	2.79	3.34	-0.694	-2.012	-1.084	-0.951	0
v5_1	-4.357	-4.995	-5.386	-5.932	-5.85	-6.079	-5.033	-6.103	-6.627	-6.664	-2.729	0.36	6.354	2.278	2.932	-1.489	-2.672	-1.842	-1.422	-0.748	0
v6_1	-3.769	-4.39	-4.693	-5.27	-5.218	-4.858	-3.547	-4.677	-5.26	-5.378	-2.122	2.681	5.78	3.302	3.928	-0.35	-1.744	-0.763	-0.732	0.353	1.141	0
v7_1	-4.075	-4.708	-5.114	-5.654	-5.559	-5.662	-4.307	-5.456	-6.021	-6.093	-2.419	2.34	6.55	2.975	4.313	-0.909	-2.236	-1.317	-1.066	-0.158	0.646	-0.715	0
v8_1	-5.069	-5.729	-6.124	-6.74	-6.7	-8.465	-7.093	-8.262	-8.598	-8.475	-3.451	-1.395	6.329	0.759	1.889	-3.182	-3.916	-3.399	-2.276	-2.401	-1.808	-2.773	-2.5	0
v9_1	-4.91	-5.565	-5.97	-6.594	-6.387	-7.937	-6.628	-7.532	-8.123	-8.044	-3.299	-0.971	5.344	1.837	1.917	-2.732	-3.596	-2.973	-2.09	-1.987	-1.336	-2.603	-2.029	0.485	0
v10_1	-4.253	-4.887	-5.279	-5.809	-5.686	-6.028	-4.765	-5.613	-6.365	-6.419	-2.622	0.571	6.361	4.003	3.078	-1.276	-2.502	-1.641	-1.301	-0.544	0.211	-0.93	-0.424	1.989	1.791	0
v11_1	-3.992	-4.616	-5.011	-5.492	-5.422	-5.317	-4.107	-5.129	-5.484	-5.79	-2.363	0.995	6.202	2.718	3.277	-0.79	-2.093	-1.175	-1.011	-0.091	0.657	-0.448	0.062	2.323	1.903	0.452	0
v12_1	-3.562	-4.167	-4.566	-4.973	-4.916	-4.276	-3.144	-4.107	-4.696	-4.669	-1.937	1.601	6.103	3.129	3.603	-0.079	-1.458	-0.48	-0.545	0.569	1.291	0.248	0.751	2.791	2.425	1.098	0.657	0
vvv2_1	0.453	0.107	-0.188	-0.156	-0.168	1.225	1.653	1.282	0.989	0.859	2.891	3.55	4.84	3.999	4.109	2.952	2.248	2.774	3.134	3.151	3.45	3.079	3.266	3.879	3.785	3.386	3.229	2.963	0
a1_2	-0.2	-0.762	-1.217	-1.266	-1.269	1.596	2.661	1.735	0.989	0.659	1.584	7.419	11.436	9.014	9.512	5.473	3.35	4.873	3.465	6.143	7.085	5.859	6.545	8.777	8.378	6.854	6.253	5.336	-0.651	0
a2_2	1.037	0.494	0.024	0.09	0.068	3.488	4.51	3.615	2.853	2.488	2.858	9.109	12.872	10.635	11.11	7.19	4.958	6.569	4.864	7.842	8.786	7.575	8.268	10.425	10.043	8.557	7.952	7.015	0.229	2.653	0
a3_2	1.364	0.81	0.323	0.42	0.392	4.207	5.305	4.341	3.502	3.093	3.254	10.397	14.647	12.18	12.759	8.187	5.634	7.466	5.406	8.911	10.024	8.626	9.442	11.979	11.517	9.756	9.039	7.948	0.443	3.821	0.806	0
a4_2	1.203	0.65	0.168	0.25	0.224	3.91	4.994	4.043	3.223	2.826	3.075	9.983	14.136	11.709	12.265	7.839	5.368	7.143	5.185	8.548	9.621	8.265	9.052	11.504	11.06	9.362	8.672	7.618	0.333	3.309	0.37	-0.51	0
a5_2	0.994	0.443	-0.032	0.031	0.009	3.513	4.573	3.645	2.853	2.475	2.839	9.394	13.388	11.032	11.552	7.354	5.007	6.696	4.888	8.038	9.05	7.762	8.503	10.822	10.406	8.805	8.156	7.159	0.19	2.677	-0.135	-0.927	-0.557	0
a6_2	-0.941	-1.547	-2.014	-2.165	-2.15	0.58	1.902	0.754	-0.122	-0.475	0.931	8.324	14.622	10.978	11.969	5.466	2.766	4.648	2.927	6.366	7.81	6	7.033	10.747	9.998	7.449	6.526	5.232	-1.164	-1.204	-3.224	-3.986	-3.67	-3.248	0
a7_2	-0.631	-1.239	-1.716	-1.836	-1.827	1.218	2.586	1.394	0.462	0.074	1.279	9.428	16.3	12.408	13.571	6.281	3.321	5.375	3.368	7.24	8.86	6.862	8.021	12.218	11.346	8.455	7.416	5.982	-0.954	-0.696	-2.779	-3.736	-3.463	-2.788	1.029	0
a8_2	-0.59	-1.196	-1.673	-1.787	-1.779	1.286	2.644	1.461	0.533	0.145	1.319	9.404	16.128	12.313	13.436	6.306	3.367	5.409	3.408	7.254	8.847	6.88	8.02	12.118	11.273	8.449	7.428	6.012	-0.926	-0.625	-2.702	-3.439	-3.124	-2.958	1.139	0.145	0
a9_2	-0.575	-1.176	-1.648	-1.757	-1.75	1.253	2.555	1.421	0.529	0.154	1.312	8.884	14.939	11.454	12.398	6.055	3.292	5.224	3.36	6.944	8.381	6.587	7.619	11.233	10.513	8.023	7.103	5.8	-0.916	-0.594	-2.623	-3.329	-3.025	-2.623	1.058	0.155	0.026	0
a10_2	-0.394	-0.993	-1.469	-1.558	-1.554	1.593	2.897	1.76	0.854	0.465	1.505	9.263	15.327	11.856	12.809	6.397	3.57	5.548	3.588	7.292	8.754	6.937	7.989	11.643	10.915	8.392	7.454	6.125	-0.793	-0.296	-2.339	-3.024	-2.724	-2.329	1.607	0.751	0.61	0.531	0
ccc1_2	1.304	0.977	0.689	0.748	0.732	2.255	2.676	2.312	2.013	1.875	2.349	4.32	5.533	4.743	4.848	3.757	3.078	3.585	3.279	3.984	4.226	3.877	4.055	4.634	4.544	4.166	4.015	3.761	0.748	1.487	0.693	0.513	0.608	0.731	2.017	1.826	1.799	1.787	1.674	0
c1_2	-5.33	-5.993	-6.366	-7.073	-6.96	-9.113	-7.748	-8.86	-9.19	-9.025	-3.736	-2.292	5.598	-0.273	0.429	-3.829	-4.363	-3.972	-2.621	-3.092	-2.63	-3.551	-3.314	-1.156	-1.559	-2.788	-3.026	-3.391	-4.047	-9.288	-10.9	-12.451	-12.041	-11.339	-11.555	-12.878	-12.972	-12.005	-12.415	-4.791	0
c2_2	-6.129	-6.8	-7.153	-7.961	-7.83	-11.026	-9.702	-10.761	-10.94	-10.655	-4.601	-4.984	2.086	-3.809	-3.761	-5.856	-5.762	-5.78	-3.684	-5.219	-5.198	-5.682	-5.771	-5.022	-4.98	-5.247	-5.191	-5.225	-4.569	-10.803	-12.297	-14.022	-13.537	-12.696	-13.885	-15.656	-15.403	-14.226	-14.626	-5.281	-3.765	0
c3_2	-4.962	-5.611	-5.989	-6.621	-6.521	-7.775	-6.48	-7.55	-7.989	-7.939	-3.363	-1.179	5.11	0.694	1.295	-2.84	-3.687	-3.089	-2.183	-2.123	-1.52	-2.534	-2.163	0.077	-0.341	-1.702	-2.045	-2.54	-3.835	-8.286	-9.93	-11.315	-10.889	-10.107	-9.616	-10.82	-10.54	-10.138	-10.522	-4.593	0.967	3.976	0
c4_2	-5.158	-5.818	-6.195	-6.874	-6.766	-8.611	-7.254	-8.365	-8.737	-8.611	-3.554	-1.727	5.881	0.363	1.108	-3.377	-4.055	-3.57	-2.401	-2.631	-2.082	-3.079	-2.772	-0.42	-0.879	-2.259	-2.557	-2.992	-3.94	-8.905	-10.539	-12.12	-11.574	-10.966	-10.878	-12.171	-12.235	-11.358	-11.765	-4.69	0.751	4.059	-0.4	0
v1_2	-4.071	-4.705	-5.102	-5.613	-5.535	-5.683	-4.408	-5.479	-6.041	-6.111	-2.419	1.068	6.993	3.077	3.752	-0.881	-2.209	-1.281	-1.057	-0.133	0.69	-0.519	0.03	2.611	2.115	0.462	-0.035	-0.736	-3.259	-6.624	-8.375	-9.599	-9.192	-8.627	-7.077	-8.081	-8.08	-7.666	-8.039	-4.043	3.415	5.901	2.216	2.867	0
v2_2	-3.18	-3.779	-4.185	-4.547	-4.495	-3.545	-2.424	-3.379	-3.993	-4.168	-1.534	2.329	6.705	3.882	4.348	0.597	-0.891	0.165	-0.085	1.253	2.014	0.934	1.468	3.539	3.172	1.814	1.345	0.643	-2.704	-4.637	-6.382	-7.26	-6.939	-6.502	-4.408	-5.118	-5.155	-4.984	-5.304	-3.521	4.115	5.873	3.228	3.727	1.454	0
v3_2	-3.539	-4.151	-4.553	-4.97	-4.909	-4.32	-3.148	-4.142	-4.744	-4.888	-1.892	1.838	6.638	3.517	4.035	0.037	-1.403	-0.387	-0.476	0.722	1.504	0.383	0.924	3.139	2.739	1.296	0.816	0.113	-2.933	-5.386	-7.013	-8.079	-7.731	-7.259	-5.338	-6.133	-6.162	-5.922	-6.26	-3.739	3.773	5.711	2.799	3.351	0.905	-0.555	0
vvv1_2	0.104	-0.276	-0.596	-0.578	-0.589	1.065	1.574	1.134	0.78	0.62	1.289	3.57	5.06	4.089	4.22	2.884	2.08	2.679	2.344	3.16	3.455	3.029	3.245	3.956	3.845	3.381	3.198	2.891	-0.323	0.247	-0.61	-0.817	-0.712	-0.576	0.85	0.611	0.579	0.569	0.429	-3.661	4.15	4.75	3.903	4.025	3.227	2.601	2.863	0
v4_2	-3.838	-4.461	-4.86	-5.327	-5.257	-5.036	-3.814	-4.845	-5.429	-5.538	-2.189	1.404	6.693	3.226	3.807	-0.464	-1.847	-0.876	-0.805	0.25	1.05	-0.111	0.433	2.807	2.367	0.833	0.346	-0.355	-3.119	-6.014	-7.733	-8.813	-8.445	-7.931	-6.328	-7.257	-7.265	-6.928	-7.291	-3.908	3.472	5.756	2.438	3.004	0.409	-1.046	-0.494	-3.077	0
v5_2	-3.687	-4.305	-4.706	-5.148	-5.082	-4.67	-3.472	-4.486	-5.08	-5.207	-2.039	1.634	6.674	3.385	3.934	-0.204	-1.62	-0.624	-0.637	0.497	1.29	0.146	0.691	2.987	2.567	1.076	0.592	-0.112	-3.025	-5.696	-7.412	-8.44	-8.084	-7.589	-5.684	-6.62	-6.637	-6.359	-6.705	-3.828	3.619	5.774	2.63	3.175	0.669	-0.793	-0.238	-2.97	0.258
v6_2	-4.983	-5.641	-6.022	-6.678	-6.574	-8.181	-6.82	-7.938	-8.343	-8.244	-3.366	-1.179	6.445	1.02	1.837	-2.945	-3.751	-3.181	-2.172	-2.183	-1.554	-2.628	-2.26	0.295	-0.221	-1.75	-2.102	-2.601	-3.827	-8.563	-10.222	-11.58	-11.272	-10.617	-10.344	-11.621	-11.667	-10.847	-11.253	-4.587	2.236	4.618	0.158	0.669	-2.322	-3.323	-2.892	-3.898	-2.545
v7_2	-4.503	-5.151	-5.542	-6.126	-6.035	-6.884	-5.548	-6.659	-7.155	-7.146	-2.861	0.161	7.099	2.388	3.198	-1.795	-2.923	-2.137	-1.567	-1.02	-0.235	-1.441	-0.94	1.819	1.262	-0.463	-0.925	-1.565	-3.524	-7.539	-9.248	-10.596	-10.17	-9.577	-8.656	-9.706	-9.826	-9.217	-9.611	-4.301	4.216	5.657	1.43	3.384	-0.991	-2.31	-1.804	-3.547	-1.34
v8_2	-4.63	-5.279	-5.666	-6.266	-6.172	-7.165	-5.834	-6.939	-7.417	-7.392	-2.997	-0.198	6.69	1.968	2.741	-2.087	-3.136	-2.403	-1.733	-1.322	-0.583	-1.744	-1.278	1.377	0.846	-0.8	-1.232	-1.834	-3.608	-7.769	-9.463	-10.852	-10.289	-9.792	-8.987	-10.132	-10.176	-9.536	-9.93	-4.38	2.294	5.388	1.055	2.862	-1.329	-2.564	-2.077	-3.643	-1.651
v9_2	-4.079	-4.709	-5.104	-5.607	-5.531	-5.608	-4.362	-5.409	-5.971	-6.049	-2.437	0.943	6.511	2.823	3.432	-0.926	-2.226	-1.315	-1.089	-0.201	0.583	-0.576	-0.049	2.371	1.918	0.367	-0.107	-0.784	-3.272	-6.501	-8.215	-9.36	-8.981	-8.28	-6.931	-7.896	-7.768	-7.514	-7.877	-4.063	3.106	5.291	3.616	2.55	-0.079	-1.478	-0.941	-3.255	-0.467
v10_2	-4.346	-4.985	-5.378	-5.927	-5.843	-6.341	-5.05	-6.129	-6.656	-6.688	-2.707	0.441	6.604	2.466	3.151	-1.459	-2.657	-1.82	-1.396	-0.711	0.066	-1.108	-0.599	1.957	1.463	-0.154	-0.617	-1.269	-3.435	-7.109	-8.817	-10.075	-9.667	-9.001	-7.886	-8.976	-8.77	-8.458	-8.837	-4.217	2.751	5.572	3.061	2.193	-0.637	-1.984	-1.464	-3.443	-1.007
v11_2	-3.537	-4.148	-4.55	-4.965	-4.904	-4.305	-3.138	-4.128	-4.729	-4.873	-1.892	1.82	6.576	3.483	3.993	0.032	-1.402	-0.389	-0.479	0.714	1.49	0.376	0.913	3.107	2.711	1.283	0.807	0.108	-2.933	-5.371	-7.078	-8.049	-7.707	-7.234	-5.314	-6.11	-6.133	-5.805	-6.232	-3.74	3.695	5.723	2.766	3.28	0.893	-0.556	-0.005	-2.863	0.488
v12_2	-3.644	-4.259	-4.66	-5.092	-5.028	-4.548	-3.366	-4.367	-4.962	-5.096	-1.999	1.66	6.552	3.361	3.887	-0.147	-1.561	-0.564	-0.598	0.543	1.323	0.199	0.736	2.972	2.567	1.114	0.637	-0.059	-3.001	-5.587	-7.296	-8.299	-7.95	-7.465	-5.609	-6.435	-6.454	-6.193	-6.428	-3.804	3.574	5.679	2.624	3.149	0.715	-0.731	-0.181	-2.941	0.31
vvv2_2	2.237	1.993	1.775	1.832	1.819	2.937	3.232	2.976	2.767	2.669	3.016	4.374	5.207	4.661	4.731	3.989	3.525	3.873	3.686	4.147	4.309	4.071	4.191	4.584	4.524	4.268	4.168	3.996	1.747	2.462	1.864	1.732	1.804	1.896	2.69	2.552	2.534	2.525	2.444	2.984	4.694	5.028	4.562	4.625	4.188	3.829	3.978	3.247	4.085
[truncated: 39 more columns]

## Sheet: Item 15 deleted
1F with item 15 deleted N = 123
CMIN
Model	NPAR	CMIN	DF	P	CMIN/DF
Default model	40	465.954	150	0	3.106
Saturated model	190	0	0
Independence model	19	4086.92	171	0	23.9
Baseline Comparisons
Model	NFI	RFI	IFI	TLI	CFI
	Delta1	rho1	Delta2	rho2
Default model	0.886	0.87	0.92	0.908	0.919
Saturated model	1		1		1
Independence model	0	0	0	0	0
RMSEA
Model	RMSEA	LO 90	HI 90	PCLOSE
Default model	0.131	0.118	0.145	0
Independence model	0.433	0.422	0.445	0
1F with item 15 deleted N = 59
CMIN
Model	NPAR	CMIN	DF	P	CMIN/DF
Default model	40	361.177	150	0	2.408
Saturated model	190	0	0
Independence model	19	1660.55	171	0	9.711
Baseline Comparisons
Model	NFI	RFI	IFI	TLI	CFI
	Delta1	rho1	Delta2	rho2
Default model	0.782	0.752	0.86	0.838	0.858
Saturated model	1		1		1
Independence model	0	0	0	0	0
RMSEA
Model	RMSEA	LO 90	HI 90	PCLOSE
Default model	0.156	0.135	0.176	0
Independence model	0.388	0.371	0.405	0
1F with item 15 deleted N = 64
CMIN
Model	NPAR	CMIN	DF	P	CMIN/DF
Default model	40	326.648	150	0	2.178
Saturated model	190	0	0
Independence model	19	2505.16	171	0	14.65
Baseline Comparisons
Model	NFI	RFI	IFI	TLI	CFI
	Delta1	rho1	Delta2	rho2
Default model	0.87	0.851	0.925	0.914	0.924
Saturated model	1		1		1
Independence model	0	0	0	0	0
RMSEA
Model	RMSEA	LO 90	HI 90	PCLOSE
Default model	0.137	0.117	0.157	0
Independence model	0.465	0.449	0.482	0

## Sheet: Second order factor
#NAME?
CMIN
Model	NPAR	CMIN	DF	P	CMIN/DF
Default model	41	634.629	169	0	3.755
Saturated model	210	0	0
Independence model	20	4446.27	190	0	23.401
Baseline Comparisons
Model	NFI	RFI	IFI	TLI	CFI
	Delta1	rho1	Delta2	rho2
Default model	0.857	0.84	0.891	0.877	0.891
Saturated model	1		1		1
Independence model	0	0	0	0	0
RMSEA
Model	RMSEA	LO 90	HI 90	PCLOSE
Default model	0.15	0.138	0.163	0
Independence model	0.429	0.418	0.439	0
2F 20 items (Model 5) with second order factor N = 59
CMIN
Model	NPAR	CMIN	DF	P	CMIN/DF
Default model	46	370.324	164	0	2.258
Saturated model	210	0	0
Independence model	20	1794.95	190	0	9.447
Baseline Comparisons
Model	NFI	RFI	IFI	TLI	CFI
	Delta1	rho1	Delta2	rho2
Default model	0.794	0.761	0.873	0.851	0.871
Saturated model	1		1		1
Independence model	0	0	0	0	0
RMSEA
Model	RMSEA	LO 90	HI 90	PCLOSE
Default model	0.147	0.127	0.167	0
Independence model	0.382	0.366	0.398	0
2F 20 items (Model 5) with second order factor N = 64
CMIN
Model	NPAR	CMIN	DF	P	CMIN/DF
Default model	46	342.935	164	0	2.091
Saturated model	210	0	0
Independence model	20	2742.89	190	0	14.436
Baseline Comparisons
Model	NFI	RFI	IFI	TLI	CFI
	Delta1	rho1	Delta2	rho2
Default model	0.875	0.855	0.931	0.919	0.93
Saturated model	1		1		1
Independence model	0	0	0	0	0
RMSEA
Model	RMSEA	LO 90	HI 90	PCLOSE
Default model	0.132	0.112	0.151	0
Independence model	0.462	0.447	0.477	0
2F 19 items (Model 8) with second order factor N = 123
CMIN
Model	NPAR	CMIN	DF	P	CMIN/DF
Default model	39	545.697	151	0	3.614
Saturated model	190	0	0
Independence model	19	4167.53	171	0	24.372
Baseline Comparisons
Model	NFI	RFI	IFI	TLI	CFI
	Delta1	rho1	Delta2	rho2
Default model	0.869	0.852	0.902	0.888	0.901
Saturated model	1		1		1
Independence model	0	0	0	0	0
RMSEA
Model	RMSEA	LO 90	HI 90	PCLOSE
Default model	0.146	0.133	0.16	0
Independence model	0.438	0.426	0.449	0

## Sheet: Bifactor structure
2F (Model 6+A24) with bifactor structure N = 123
CMIN
Model	NPAR	CMIN	DF	P	CMIN/DF
Default model	42	574.965	168	0	3.422
Saturated model	210	0	0
Independence model	20	4446.27	190	0	23.401
Baseline Comparisons
Model	NFI	RFI	IFI	TLI	CFI
	Delta1	rho1	Delta2	rho2
Default model	0.871	0.854	0.905	0.892	0.904
Saturated model	1		1		1
Independence model	0	0	0	0	0
RMSEA
Model	RMSEA	LO 90	HI 90	PCLOSE
Default model	0.141	0.128	0.154	0
Independence model	0.429	0.418	0.439	0
2F with bifactor structure N = 59
CMIN
Model	NPAR	CMIN	DF	P	CMIN/DF
Default model	42	396.324	168	0	2.359
Saturated model	210	0	0
Independence model	20	1794.95	190	0	9.447
Baseline Comparisons
Model	NFI	RFI	IFI	TLI	CFI
	Delta1	rho1	Delta2	rho2
Default model	0.779	0.75	0.86	0.839	0.858
Saturated model	1		1		1
Independence model	0	0	0	0	0
RMSEA
Model	RMSEA	LO 90	HI 90	PCLOSE
Default model	0.153	0.134	0.173	0
Independence model	0.382	0.366	0.398	0
2F with bifactor structure N = 64
CMIN
Model	NPAR	CMIN	DF	P	CMIN/DF
Default model	42	375.304	168	0	2.234
Saturated model	210	0	0
Independence model	20	2742.89	190	0	14.436
Baseline Comparisons
Model	NFI	RFI	IFI	TLI	CFI
	Delta1	rho1	Delta2	rho2
Default model	0.863	0.845	0.919	0.908	0.919
Saturated model	1		1		1
Independence model	0	0	0	0	0
RMSEA
Model	RMSEA	LO 90	HI 90	PCLOSE
Default model	0.14	0.121	0.159	0
Independence model	0.462	0.447	0.477	0

## Sheet: Invariance six-item Internet Ad
Critical Ratios for Differences between Parameters (Unconstrained)
	a1_1	a2_1	a3_1	a4_1	a5_1	c1_1	c2_1	v1_1	vvv1_1	v2_1	v3_1	v4_1	v5_1	v6_1	a1_2	a2_2	a3_2	a4_2	a5_2	c1_2	c2_2	v1_2	vvv1_2	v2_2	v3_2	v4_2	v5_2	v6_2
a1_1	0
a2_1	-0.104	0
a3_1	0.73	1.094	0
a4_1	0.702	1.055	-0.039	0
a5_1	1.603	1.511	0.9	0.91	0
c1_1	-4.581	-5.101	-5.773	-5.847	-5.183	0
c2_1	-7.256	-8.318	-9.009	-9.506	-7.606	-2.684	0
v1_1	-3.284	-3.568	-4.216	-4.331	-4.043	1.829	5.052	0
vvv1_1	-0.443	-0.414	-0.691	-0.692	-0.958	2.554	3.691	1.523	0
v2_1	-2.699	-2.944	-3.555	-3.59	-3.477	3.334	4.989	0.405	-1.331	0
v3_1	-4.814	-5.268	-6.122	-6.228	-5.407	0.4	4.28	-1.758	-2.476	-2.187	0
v4_1	-6.309	-7.188	-7.764	-8.265	-6.742	-1.453	2.773	-3.747	-3.258	-3.97	-2.672	0
v5_1	-6.083	-6.89	-7.754	-7.69	-6.53	-1.285	2.451	-3.402	-3.206	-3.849	-2.479	0.338	0
v6_1	-2.127	-2.257	-2.822	-2.839	-2.855	3.769	4.968	0.903	-0.977	0.584	2.549	4.076	3.983	0
a1_2	-0.788	-0.796	-1.482	-1.499	-1.786	6.116	12.111	3.614	0.094	2.988	7.242	11.021	10.733	2.043	0
a2_2	-0.069	0.019	-0.689	-0.687	-1.163	7.636	15.609	4.842	0.568	4.119	9.518	14.684	14.323	2.983	1.898	0
a3_2	0.005	0.101	-0.591	-0.586	-1.081	7.434	14.395	4.774	0.61	4.084	9.016	13.406	13.091	2.993	2.14	0.296	0
a4_2	-0.362	-0.315	-1.009	-1.014	-1.411	6.901	13.643	4.278	0.374	3.609	8.341	12.612	12.299	2.572	0.997	-0.87	-1.137	0
a5_2	-0.108	-0.03	-0.693	-0.691	-1.154	6.77	12.315	4.344	0.527	3.719	7.878	11.288	11.03	2.736	1.625	-0.106	-0.287	0.532	0
c1_2	-5.283	-5.84	-6.53	-6.658	-5.832	-0.583	2.338	-2.52	-2.86	-2.877	-1.167	0.89	0.661	-3.161	-7.328	-9.21	-8.964	-8.299	-7.927	0
c2_2	-7.526	-8.56	-9.351	-9.594	-7.819	-3.522	-1.308	-5.511	-4.063	-5.746	-5.62	-4.067	-4.412	-5.625	-13.94	-18.464	-16.22	-15.804	-13.955	-3.108	0
v1_2	-4.381	-4.834	-5.526	-5.633	-5.017	0.755	4.255	-1.297	-2.257	-1.706	0.479	2.854	2.613	-2.116	-6.276	-8.29	-7.895	-7.271	-7	1.44	5.161	0
vvv1_2	2.991	3.043	2.867	2.876	2.618	4.54	5.081	4.075	3.086	3.958	4.497	4.853	4.818	3.775	3.21	2.996	2.939	3.081	2.997	4.686	5.198	4.371	0
v2_2	-3.301	-3.585	-4.234	-4.302	-4.029	1.921	5.238	-0.047	-1.618	-0.476	1.886	4.058	3.852	-0.993	-3.925	-5.332	-5.262	-4.692	-4.698	3.592	5.902	1.32	-4.105	0
v3_2	-5.819	-6.593	-7.372	-7.559	-6.303	-0.816	3.463	-3.06	-3.003	-3.426	-1.776	1.27	0.883	-3.621	-9.762	-12.746	-12.205	-11.173	-10.153	-0.131	4.391	-1.912	-4.742	-3.421	0
v4_2	-6.284	-7.137	-7.923	-8.128	-6.715	-1.528	2.31	-3.721	-3.282	-4.053	-2.82	-0.101	-0.492	-4.16	-11.066	-14.791	-12.881	-12.662	-11.335	-0.9	4.002	-2.981	-4.863	-3.964	-1.153	0
v5_2	-4.358	-4.832	-5.542	-5.657	-4.999	0.948	4.854	-1.195	-2.205	-1.62	0.717	3.37	3.103	-2.046	-6.118	-8.038	-7.798	-7.008	-6.813	1.766	5.633	0.177	-4.381	-1.259	2.563	3.215	0
v6_2	-2.305	-2.441	-3.024	-3.059	-3.084	2.625	5.354	0.874	-1.041	0.468	2.644	4.393	4.23	-0.078	-2.273	-3.3	-3.318	-2.85	-2.977	4.3	5.869	2.127	-3.82	1.026	3.899	4.311	2.119	0

## Sheet: EFA Whole EDs sample
KMO and Bartlett's Test
Kaiser-Meyer-Olkin Measure of Sampling Adequacy.		0.956264
Bartlett's Test of Sphericity	Approx. Chi-Square	4172.94
	df	190
	Sig.	0
Communalities
	Initial
Do you choose to spend mor e time online over going out with others?	0.881508
Do you snap, yell, or act annoyed if someone bothers you while you are online?	0.875916
Do you fear that life without the Internet would be boring, empty and joyless?	0.883104
Do you feel preoccupied with the Internet when off-line or fantasise about being online?	0.947426
Do you block disturbing thoughts about your life with soothing thoughts of the Internet?	0.908291
Do you neglect household chores to spend more time online?	0.788131
Do you lose sleep due to late night log-ins?	0.940645
Do you feel depressed, moody, or nervous when you are of fline, which goes away once you are back online?	0.872995
Do you find that you stay online longer than you intended?	0.795927
Do you try to hide how long you’ve been online?	0.928065
Does your work suffer (e.g., postponing things, not meeting deadlines, etc.) because of the amount of time you spend online?	0.910111
Does your job performance or productivity suffer because of the Internet?	0.919935
Do you become defensive or secretive when anyone asks you what you do online?	0.922631
Do you find yourself anticipating when you go online again?	0.923449
Do you check your E-mail before something else that you need to do?	0.898199
Do you try to cut down the amount of time you spend online and fail?	0.932112
Do others in your life complain to you about the amount of time you spend online?	0.906238
Do you find yourself saying “Just a few more minutes” when online?	0.939837
Do you form new relationships with fellow online users?	0.836363
Do you prefer excitement of the Internet to intimacy with your partner?	0.791233
Extraction Method: Maximum Likelihood.
Total Variance Explained
Factor	Initial Eigenvalues
	Total	% of Variance	Cumulative %
1	16.6768	83.3838	83.3838
2	0.575602	2.87801	86.2618
3	0.373729	1.86865	88.1305
4	0.313195	1.56598	89.6965
5	0.280885	1.40442	91.1009
6	0.261052	1.30526	92.4061
7	0.243332	1.21666	93.6228
8	0.186194	0.930968	94.5538
9	0.172751	0.863755	95.4175
10	0.15372	0.7686	96.1861
11	0.144193	0.720963	96.9071
12	0.119645	0.598224	97.5053
13	0.114013	0.570065	98.0754
14	0.095507	0.477535	98.5529
15	0.0828929	0.414464	98.9674
16	0.0609452	0.304726	99.2721
17	0.0495087	0.247544	99.5197
18	0.0358175	0.179087	99.6987
19	0.0341752	0.170876	99.8696
20	0.0260765	0.130382	100
Extraction Method: Maximum Likelihood.

[truncated: 2 more sheets: EFA Anorexia, EFA Other EDs]
